# Supplementary material for: DNMTs Play an Important Role in Maintaining the Pluripotency of Leukemia Inhibitory Factor-Dependent Embryonic Stem Cells
Source: PubMed Central journal article supplement (PMC7940253; doi:10.1016/j.stemcr.2021.01.017), 2021-02-25
Supplement: mmc2.pdf [file mmc2.pdf]

# DNMTs Play an Important Role in Maintaining the Pluripotency of Leukemia Inhibitory Factor-Dependent Embryonic Stem Cells

Baojiang Wu,<sup>1,2,11</sup> Yunxia Li,<sup>1,2,10,11</sup> Bojiang Li,<sup>3,11</sup> Baojing Zhang,<sup>1,2,11</sup> Yanqiu Wang,<sup>1,2</sup> Lin Li,<sup>4,5</sup> Junpeng Gao,<sup>5</sup> Yuting Fu,<sup>1,2</sup> Shudong Li,<sup>6</sup> Chen Chen,<sup>1,2</sup> M. Azim Surani,<sup>7</sup> Fuchou Tang,<sup>5,8,9</sup> Xihe Li,<sup>1,2,10,\*</sup> and Siqin Bao<sup>1,2,\*</sup>

<sup>1</sup>The State Key Laboratory of Reproductive Regulation and Breeding of Grassland Livestock, Inner Mongolia University, Hohhot 010020, China

<sup>2</sup>Research Center for Animal Genetic Resources of Mongolia Plateau, College of Life Sciences, Inner Mongolia University, Hohhot 010020, China

<sup>3</sup>College of Animal Science and Veterinary Medicine, Shenyang Agricultural University, Shenyang 110866, China

<sup>4</sup>Guangdong Provincial Key Laboratory of Proteomics, Department of Pathophysiology, School of Basic Medical Sciences, Southern Medical University, Guangzhou 510515, China

<sup>5</sup>Beijing Advanced Innovation Center for Genomics and Biomedical Pioneering Innovation Center, College of Life Sciences, Peking University, Beijing 100871, China

<sup>6</sup>Cancer Research UK and Medical Research Council Oxford Institute for Radiation Oncology, Department of Oncology, University of Oxford, Oxford OX3 7DQ, UK

<sup>7</sup>Wellcome Trust Cancer Research UK Gurdon Institute, Tennis Court Road, University of Cambridge, Cambridge CB2 1QN, UK

<sup>8</sup>Peking-Tsinghua Center for Life Sciences, Peking University, Beijing 100871, China

<sup>9</sup>Ministry of Education Key Laboratory of Cell Proliferation and Differentiation, Beijing 100871, China

<sup>10</sup>Inner Mongolia Saikexing Institute of Breeding and Reproductive Biotechnology in Domestic Animals, Hohhot 011517, China

<sup>11</sup>These authors contributed equally

\*Correspondence: [baosq@imu.edu.cn](mailto:baosq@imu.edu.cn) (X.L.), [lixh@imu.edu.cn](mailto:lixh@imu.edu.cn) (S.B.)

<https://doi.org/10.1016/j.stemcr.2021.01.017>

## SUMMARY

Naive pluripotency can be maintained in medium with two inhibitors plus leukemia inhibitory factor (2i/LIF) supplementation, which primarily affects canonical WNT, FGF/ERK, and JAK/STAT3 signaling. However, whether one of these three supplements alone is sufficient to maintain naive self-renewal remains unclear. Here we show that LIF alone in medium is sufficient for adaptation of 2i/L-ESCs to embryonic stem cells (ESCs) in a hypermethylated state (L-ESCs). Global transcriptomic analysis shows that L-ESCs are close to 2i/L-ESCs and in a stable state between naive and primed pluripotency. Notably, our results demonstrate that DNA methyltransferases (DNMTs) play an important role in LIF-dependent mouse ESC adaptation and self-renewal. LIF-dependent ESC adaptation efficiency is significantly increased in serum treatment and reduced in *Dnmt3a* or *Dnmt3l* knockout ESCs. Importantly, unlike epiblast stem cells, L-ESCs contribute to somatic tissues and germ cells in chimeras. L-ESCs cultured under such simple conditions as in this study would provide a more conducive platform to clarify the molecular mechanism of ESCs in *in vitro* culture.

## INTRODUCTION

Mouse embryonic stem cells (ESCs) are isolated from the inner cell mass (ICM) of the pre-implantation embryo (Martin, 1981). Since pluripotent mouse ESCs were first established 4 decades ago, various culture systems of ESCs have been developed, including initially using feeder/serum/cytokines, then leukemia inhibitory factor (LIF) and bone morphogenetic protein 4 (BMP4) (Smith et al., 1988; Williams et al., 1988; Ying et al., 2003), and more recently using 2i/LIF (two inhibitors, CHIR99021 and PD0325901, and LIF) (Ying et al., 2008). It is generally believed that the optimal culture conditions for ground-state ESCs comprise the three-additive 2i/LIF supplement, which affects canonical WNT, FGF/ERK, and JAK/STAT3 signals, respectively (Ohtsuka et al., 2015). It has been reported that the combination of any two of these three supplements was sufficient to maintain naive self-renewal of ESCs (Hackett et al., 2017).

LIF is the most pleiotropic member of the interleukin-6 family of cytokines and utilizes a receptor that consists of the LIF receptor and gp130 (Ohtsuka et al., 2015). LIF is able to activate three intracellular signaling pathways: the JAK/STAT pathway, the PI3K/AKT pathway, and the SH2 domain-containing tyrosine phosphatase/mitogen-activated protein kinase pathway. LIF has antagonistic effects in different cell types, including stimulating or inhibiting cell proliferation, differentiation, and survival. Since LIF was detected in an extract from feeder cells and has been used for most mouse ESC media, it has been fully demonstrated to be an important supplement for ESC self-renewal and pluripotency (Gao et al., 2019; Williams et al., 1988; Yang et al., 2017; Ying et al., 2003, 2008). Nevertheless, essential LIF/STAT3 functions can be compensated for by activation of canonical WNT signaling and inhibition of FGF/ERK in the established culture system for self-renewal of ESCs (Ohtsuka et al., 2015). However, the consequences LIF/STAT3 signaling alone and

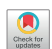

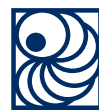

precise regulatory mechanisms for ESC self-renewal have remained largely elusive.

Mouse ESCs cultured under different culture conditions exhibit distinct DNA methylation patterns. The ESCs (2i/L-ESCs) cultured in 2i/LIF medium are globally DNA hypomethylated, whereas ESCs grown in classical medium containing feeders, serum, and LIF (S/L-ESCs) show global DNA hypermethylation (Leitch et al., 2013; Stadler et al., 2011). In addition, DNA methylation levels were shown to be reversible between S/L-ESCs and 2i/L-ESCs (Leitch et al., 2013). Previous research reported prolonged that MEK1/2 suppression impairs the epigenetic and genomic integrity as well as the developmental potential of ESCs, in part through the downregulation of DNA methylation (Choi et al., 2017; Yagi et al., 2017). In addition, DNA methylation plays an important role in embryonic development, stem cell differentiation, and cell fate conversion (Bourc'his et al., 2001; Cirio et al., 2008; Kaneda et al., 2004; Li et al., 1992; Webster et al., 2005). We also showed that hypermethylation is a key point for expanded pluripotency of ESCs in chemically defined medium (Bao et al., 2018; Wu et al., 2020).

The combination of 2i supports the self-renewal of ESCs in serum-free culture without LIF; however, addition of LIF in 2i culture condition further promotes self-renewal of ESCs, suggesting the synergistic effect of 2i and LIF (Ying et al., 2008). PD0325901 suppresses the differentiation of ESCs but does not support proliferation (Huang et al., 2015; Ying et al., 2008). CHIR99021 is highly specific to GSK3 and it alone is not sufficient to support the self-renewal of ESCs in serum-free culture (Ying et al., 2008). In this study, we focus on JAK/STAT3 signaling and show that LIF alone in serum-free and 2i-free medium is able to support ESC self-renewal and pluripotency as well as developmental potency. Our data also indicate that DNA methyltransferases (DNMTs) play an important role in LIF-dependent mouse ESC adaptation and self-renewal. The detailed analysis of LIF-alone-dependent mouse ESCs provides new insight into global DNA (de)methylation and also provides a rich resource for future studies on ESCs in *in vitro* culture.

## RESULTS

### LIF Alone Supports ESC Self-Renewal and Pluripotency in Chemically Defined Media

Serum plus LIF (S/L) medium and 2i/LIF medium (based on N2B27) are two typical ESC culture media. In particular, LIF was found in almost all mouse ESC culture media *in vitro*. Therefore, we sought to determine whether LIF alone is capable of driving continuous cycles of self-renewal of ESCs in serum-free and 2i-free medium. Here we used seven Oct4-ΔPE-GFP (GOF/GFP, mixed background of MF1, 129/

sv, and C57BL/6J strains) × 129/sv F1 mouse (Yoshimizu et al., 1999) ESC lines (W1, W2, W4, W5, W6, SQ3.3, and X/GFP; the sex of the cell lines is indicated in Figure S1A), which were directly derived in 2i/LIF medium (passage [p] 15–p20) and then switched to chemically defined LIF (1000 IU/mL)-alone medium based on N2B27 (L medium) (Figures 1A and S1A). Initially ESCs showed signs of differentiation, such as flattening of colonies and reduction of GOF/GFP positivity for pluripotency-related transcription factor *Oct4* (Figure 1B). However, in p3–p5, some GOF/GFP<sup>+</sup> colonies similar to those in undifferentiated ESCs were discovered in LIF-alone medium (Figure 1B). We designated these LIF-dependent GOF/GFP<sup>+</sup> ESCs in chemically defined LIF-alone medium as L-ESCs. GOF/GFP<sup>+</sup> colonies increased gradually with further passages. L-ESCs were successfully derived from all seven 2i/L-ESCs (Figures 1B and S1A).

Next, we performed fluorescence-activated cell sorting (FACS) on multiple L-ESC lines, and the sorted GOF/GFP<sup>+</sup> L-ESCs were cultured in L medium. The percentage of GOF/GFP<sup>+</sup> L-ESCs (p14–p42) ranged from 56% to 99% in several ESC lines (Figure S1B). After two or more repeated FACS assays for each L-ESC line (Figure S1B), GOF/GFP<sup>+</sup> L-ESCs reached nearly 98% purity, which was similar to the control 2i/L-ESCs (Figure S1B). These results indicate that LIF alone can maintain FACS-purified GOF/GFP<sup>+</sup> L-ESCs in an undifferentiated pluripotent state (Figures 1B and S1B), with stable growth over 40 passages (Figure S1C) and high alkaline phosphatase (AP) activity (Figure S1D). The established L-ESC lines have a normal karyotype (Figures 1C and S1E) and express pluripotent markers OCT4, SOX2, and NANOG, similar to 2i/L-ESCs, confirmed by immunofluorescence (Figures 1D and S1F). In mouse ESCs, the cells that exhibit some features of two-cell embryos comprise less than 1% (Li and Izpisua Belmonte, 2018; Macfarlan et al., 2012). Interestingly, L-ESCs also retained two-cell features, such as ZSCAN4 and MERVL activities, demonstrated by immunostaining (Figure S1G). In addition, it has been reported that both X chromosomes are active in female naive ESCs (Pasque et al., 2018; Schulz et al., 2014); concurrent with this, our immunostaining showed no H3K27me3 foci in female L-ESCs, suggesting that both X chromosomes are activated (Figure S1H). To further verify that the two X chromosomes in L-ESCs are active, we used the 2i/L-ESC line with X/GFP (X/GFP is expressed upon X chromosome reactivation) (Bao et al., 2009) to induce L-ESCs, and found that both X chromosomes in L-ESCs were activated (Figure S1I). These results suggest that L-ESCs possess some of the characteristics of 2i/L-ESCs.

For a further stringent test of the pluripotency of L-ESCs, we examined the ability for clone formation from the single-cell level. We observed that L-ESC clones could be derived from single cells in chemically defined LIF-alone

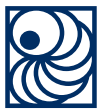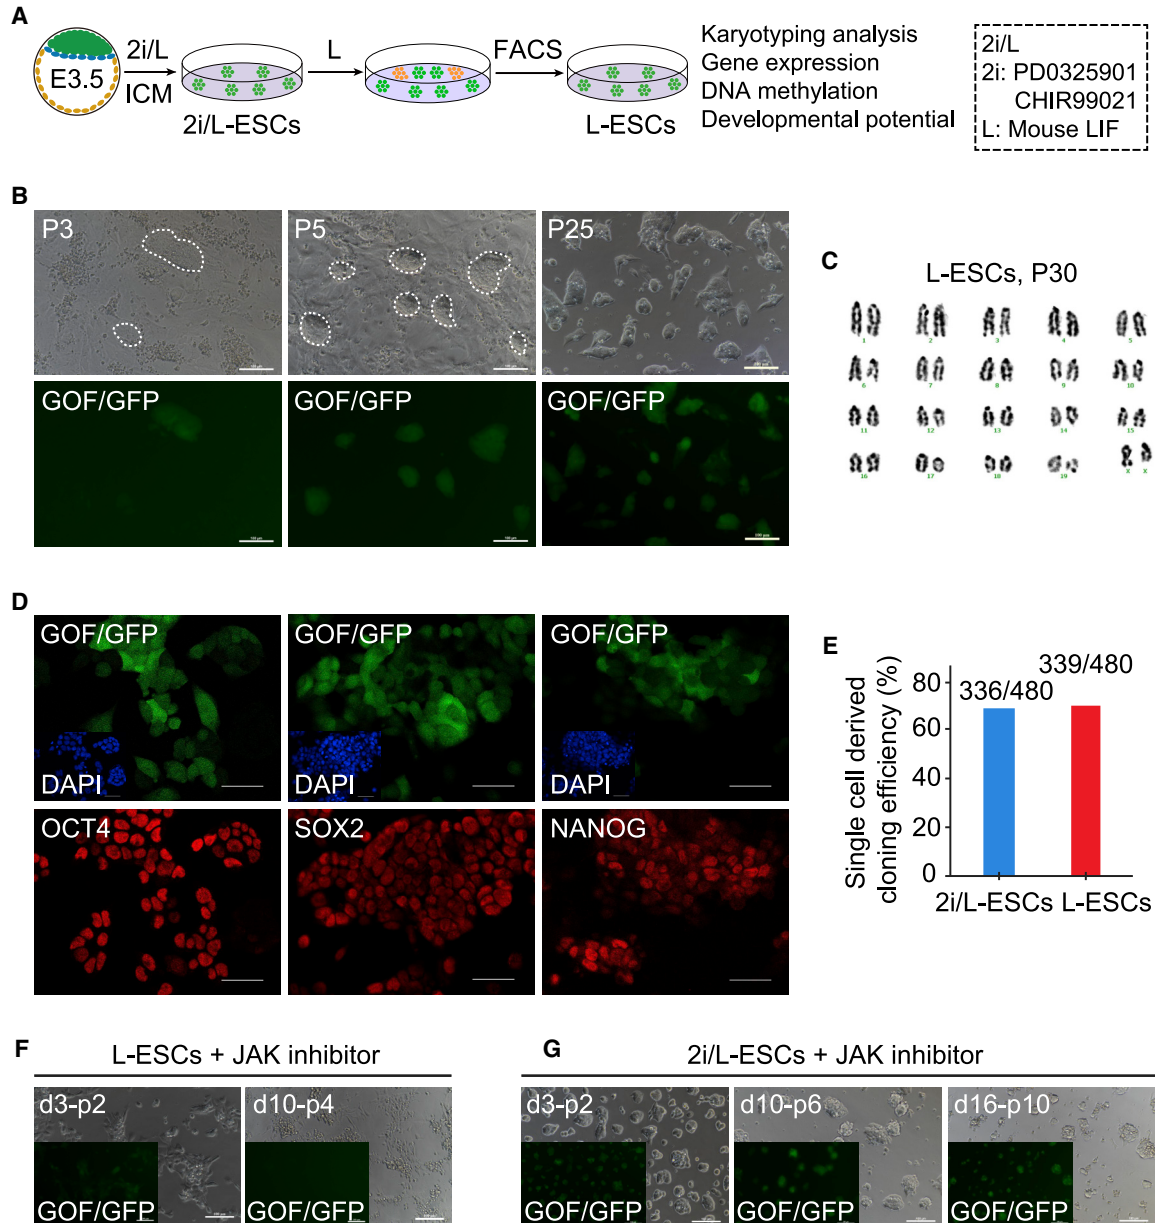

### Figure 1. LIF Alone Supports ESC Self-Renewal and Pluripotency

(A) Experimental outline of the L-ESC derivation procedure from 2i/L-ESCs.

(B) 2i/L-ESCs were switched to L medium and cultured to passages 3 (P3), P5, and P25. Here we used 2i/L-ESCs with the GOF/GFP reporter. Scale bars, 100  $\mu$ m. See also Figure S1A.

(C) Karyotyping of L-ESCs (P30,  $n = 50$ , results of three independent experiments).

(D) Immunostaining of OCT4, SOX2, and NANOG in L-ESCs (results of three independent experiments). Scale bars, 50  $\mu$ m.

(E) Single-cell clonogenicity efficiency in L-ESCs and 2i/L-ESCs ( $n = 480$  single cells of L-ESCs and 2i/L-ESCs, respectively; results of three independent experiments).

(F) L-ESCs were treated with JAK inhibitor I after day 3 P2 and day 10 P4 (results of three independent experiments). Scale bars, 100  $\mu$ m.

(G) 2i/L-ESCs were treated with JAK inhibitor I after day 3 P2, day 10 P6, and day 16 P10 (results of three independent experiments). Scale bars, 100  $\mu$ m.

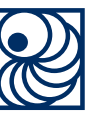

medium with high efficiency, comparable to those from 2i/L-ESCs (Figure 1E). Furthermore, to examine how essential LIF is in maintaining L-ESCs, we withdrew LIF and then added JAK inhibitor I, and observed significantly impaired propagation of L-ESCs with rapid differentiation (Figure 1F). However, LIF withdrawal and JAK inhibitor I addition did not affect the self-renewal of 2i/L-ESCs until p10 (Figure 1G). Taken together, our results suggest that LIF is an important and essential regulator in the maintenance of L-ESCs. In contrast to the previous notion that LIF and 2i both play an important role in ESC self-renewal, and establish a unique ground state of ESCs, in this study we showed that LIF alone is capable of supporting ESCs for self-renewal and proliferation over p40.

### Global Transcriptional Features of L-ESCs

To examine whether L-ESCs have distinct molecular features, we carried out RNA sequencing (RNA-seq) on L-ESCs, 2i/L-ESCs, S/L-ESCs and epiblast stem cells (EpiSCs). Unsupervised hierarchical clustering and principal component analysis showed that L-ESCs were close to 2i/L-ESCs (Figures 2A and 2B) and appeared to be at an intermediate state between naive ESCs and primed EpiSCs (Figure 2A). Comparing L-ESCs and 2i/L-ESCs, L-ESC differentially expressed genes were related to embryonic morphogenesis, cellular lipid metabolic processes, pattern specification processes, embryonic organ morphogenesis, and DNA hypermethylation, whereas 2i/L-ESC differentially expressed genes were related to stem cell development, stem cell proliferation, gamete generation, and meiotic cell-cycle phase (Figure 2C). In addition, our data indicated that most general naive markers in L-ESCs were clustered with 2i/L-ESCs (Figures S2A and S2B), and primed markers in L-ESCs exhibit intermediate state between 2i/L-ESCs and EpiSCs (Figure S2C). Furthermore,  $\beta$ -CATENIN and ERK play central roles in balancing differentiation and self-renewal (Aulicino et al., 2020); hence, we tested the  $\beta$ -CATENIN and ERK levels in L-ESCs. Notably, some WNT signaling-related genes and the protein level of  $\beta$ -CATENIN were differentially expressed in L-ESCs compared with 2i/L-ESCs (Figures S2D and S2E). Meanwhile, the protein level of p-ERK was significantly upregulated in L-ESCs compared with 2i/L-ESCs (Figure S2E). These data show that L-ESCs display distinct molecular features for pluripotency. Meanwhile, we used the short time-series expression miner (STEM) method (Ernst and Bar-Joseph, 2006) to analyze gene expression profiles on L-ESCs, 2i/L-ESCs, S/L-ESCs, and EpiSCs. Interestingly, 3,347 differentially expressed genes (profile 7) were significantly highly expressed in L-ESCs and 2i/L-ESCs compared with S/L-ESCs and EpiSCs (Figure 2D). Notably, a total of 1,621 genes (profile 2) were significantly upregulated in 2i/L-ESCs compared with L-ESCs, S/L-ESCs and EpiSCs (Figure 2D). In addition, previous studies showed that 2i/L-ESCs were equal to the ICM of

E3.5 blastocysts, whereas S/L-ESCs were close to the epiblast of E4.5–E5.5 (Boroviak et al., 2014). In our study, we found that 2i/L-ESCs and L-ESCs are closer than S/L-ESCs based on their molecular features as revealed by the RNA-seq analysis (Figure 2A). These RNA-seq analyses suggest that L-ESCs are in a stable state between naive and primed pluripotency. Recently, Austin Smith and colleagues (Kinoshita et al., 2020; Yu et al., 2020) described the intermediate formative stem cells (FS cells), and most FS cell-related genes were lower in L-ESCs compared with 2i/L-ESCs (Figure S2F). Therefore, L-ESCs may represent a distinct intermediate state of ESC *in vitro* culture; the relevant *in vivo* developmental stage remains to be further determined.

### L-ESCs Exhibit DNA Hypermethylation and Reserve Genomic Imprints

ESCs cultured in 2i/LIF or LIF plus serum supplemented media represent two states of pluripotency of ESCs (Atlasi et al., 2019; Marks et al., 2012). Despite their similarities in pluripotency, 2i/LIF- and S/L-ESCs rely on different signaling pathways and display strong differences in transcriptional and epigenetic landscapes (Habibi et al., 2013; Joshi et al., 2015; Ter Huurne et al., 2017). Here, we asked whether there are different DNA methylation levels among L-ESCs, 2i/L-ESCs, and S/L-ESCs. Whole-genome bisulfite sequencing (WGBS) was performed, and DNA methylation profiling of L-ESCs was compared with 2i/L-ESCs and S/L-ESCs. To avoid the effect of sex on DNA methylation in L-ESCs, the male cell lines (2i/L-ESCs and L-ESCs) were selected for DNA methylation analysis. The levels of DNA methylation in L-ESCs (median CpG methylation of ~80%) were comparable to those of S/L-ESCs (median ~90%) and higher than those of 2i/L-ESCs (median ~30%) (Figure 3A). This DNA methylation occurs across most methylated regions, including intragenic, intergenic, exon, intron, short and long interspersed nuclear elements, and long terminal repeats (Figure S3A). In addition, expression of DNA methylation-associated genes were assessed using qPCR. As expected, DNMTs genes *Dnmt3a* and *Dnmt3l* were significantly upregulated in GOF/GFP<sup>+</sup> L-ESCs compared with GOF/GFP<sup>-</sup> cells from the L-ESC (day 5) adaptation process (Figure S3B). Moreover, the transcription levels of genes known to influence DNA methylation levels, such as *Prdm14* and *Nanog*, were significantly downregulated in L-ESCs (Figure S3B).

Notably, many histone genes exhibit lower expression levels in L-ESCs compared with 2i/L-ESCs (Figure S3C). This demonstrates that post-transcriptional regulation and epigenetic modifications may incorporate into L-ESC pluripotency, but the precise regulatory mechanism still needs to be further investigated. Meanwhile, RNA-seq data also indicated that DNA methylation-related genes *Dnmt1*, *Uhrf1*, *Dppa3*, *Zfp57*, and *Trim28* (Greenberg and

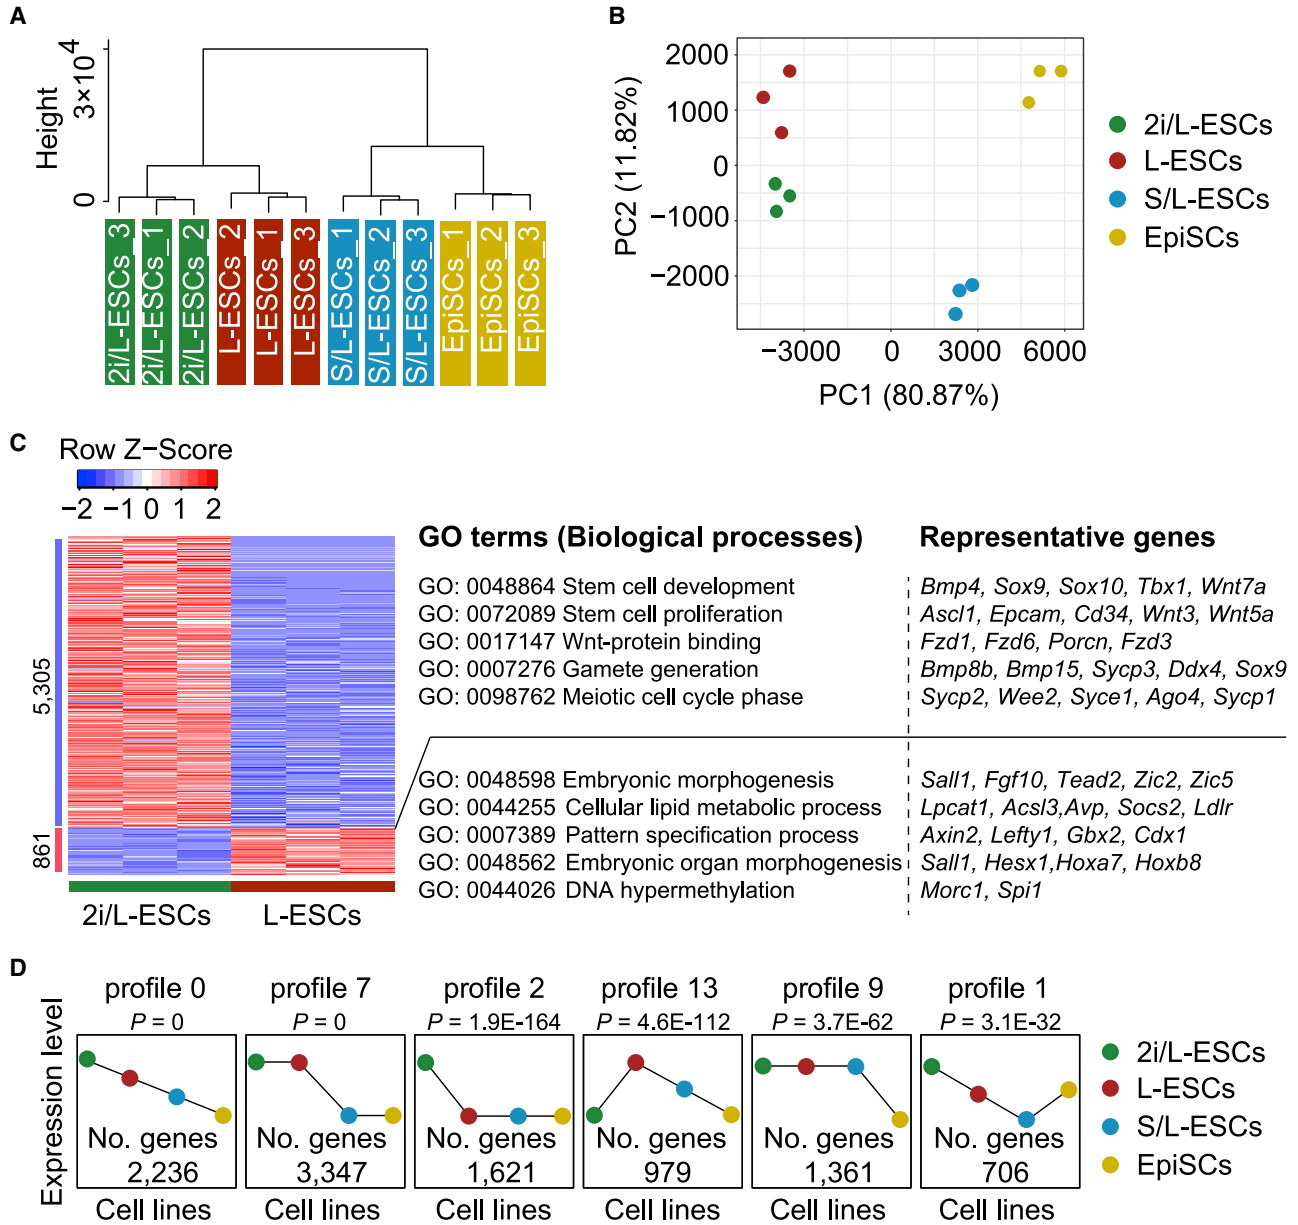

**Figure 2. Analyses of Molecular Features of L-ESCs**

(A) Unsupervised hierarchical clustering of the transcriptome from three biological replicates ( $n = 3$ ) of four pluripotent stem cell lines. (B) Principal component analysis of gene expression from the transcriptomes of three biological replicates ( $n = 3$ ) of four pluripotent stem cells.

(C) Heatmap showing differentially expressed genes (mean  $\log_2(\text{normalized read counts}) > 2$ ,  $\log_2(\text{fold change}) > 2$ , adjusted  $p < 0.05$ ) in L-ESCs ( $n = 3$ ) compared with 2i/L-ESCs ( $n = 3$ ). Significantly enriched gene ontology (GO) terms and representative genes in each cluster are listed on the right.

(D) Comparison of L-ESCs, 2i/L-ESCs, S/L-ESCs, and EpiSCs. Among differentially expressed genes, a total of 3,347 genes (profile 7) were significantly highly expressed in L-ESCs and 2i/L-ESCs compared with S/L-ESCs and EpiSCs; a total of 1,621 genes (profile 2) were significantly upregulated in 2i/L-ESCs compared with L-ESCs, S/L-ESCs, and EpiSCs ( $n = 3$  biological replicates of four pluripotent stem cell lines).

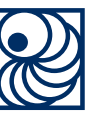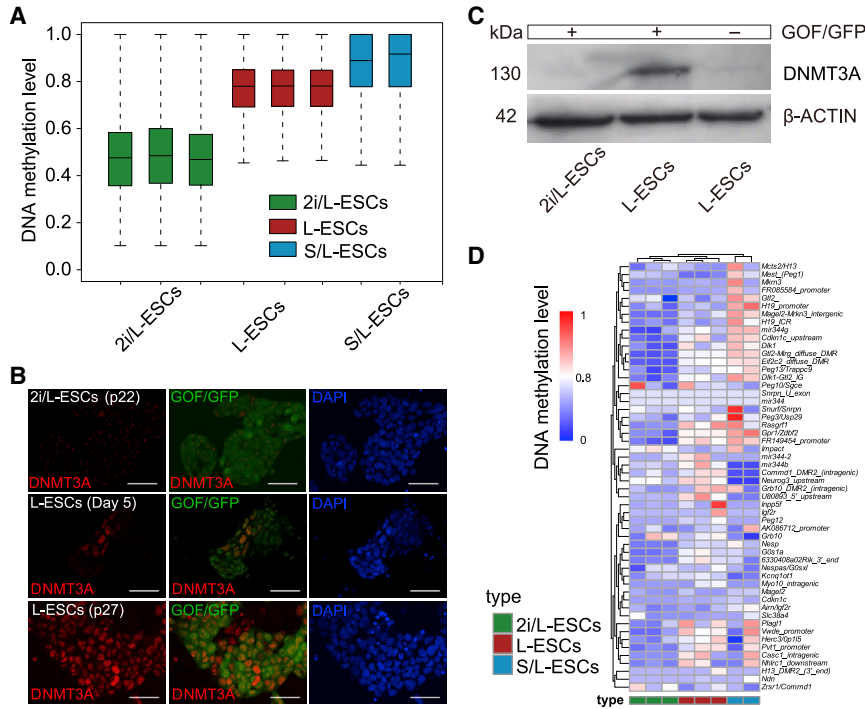

**Figure 3. DNA Methylation Pattern of L-ESCs**

(A) DNA methylation level of 2-kb genomic tiles in L-ESCs (n = 3), 2i/L-ESCs (n = 3), and S/L-ESCs (n = 2). Source data are provided in Table S1.

(B) Immunostaining of DNMT3A in 2i/L-ESCs and different passages of L-ESCs (results of three independent experiments). Scale bars, 50  $\mu$ m.

(C) Western blotting analysis for DNMT3A in early adaptation stage (day 5) GOF/GFP<sup>+</sup> and GOF/GFP<sup>-</sup> L-ESCs (results of three independent experiments).

(D) Heatmap showing DNA methylation level of ICRs in L-ESCs (n = 3), 2i/L-ESCs (n = 3), and S/L-ESCs (n = 2).

Bourc'his, 2019; Messerschmidt et al., 2014) were highly expressed in high-passage (p20) L-ESCs compared with 2i/L-ESCs (p21) (Figure S3D). In addition, *Tet1* (ten-eleven translocation 1) and *Tet2* are highly expressed in L-ESCs, and the expression of *Tet3* is low in L-ESCs (Figure S3E). This might relate to promoter demethylation of pluripotency-related genes in L-ESCs. Nevertheless, the regulatory relationship between genome-wide methylation and promoter demethylation of pluripotency genes in L-ESCs needs further investigation.

Next, we examined the dynamic changes in DNMT3A level in the L-ESC adaptation process. Upon withdrawal of PD0325901 and CHIR99021, heterogeneous expression of DNMT3A was detected in nuclei of L-ESCs at day 5, and in long-term culture the DNMT3A protein level was significantly increased in p27 stage L-ESCs (Figure 3B), consistent with the higher methylation in L-ESCs and the notion that PD0325901 promotes downregulation of DNA methylation (Choi et al., 2017; Yagi et al., 2017). The results showed that DNMT3A is an important factor in regulating DNA methylation in L-ESCs, which possess a hypermethylation state.

Proper genomic imprinting is essential for embryonic development (Plasschaert and Bartolomei, 2014; Wu et al., 2014). We further performed genomic imprinting analysis on L-ESCs, S/L-ESCs, and 2i/L-ESCs. Notably,

compared with 2i/L-ESCs, the DNA methylation levels at imprinting control regions (ICRs) were markedly higher in L-ESCs and were similar to those in S/L-ESCs (Figure 3D). From these results, we conclude that L-ESCs exhibit global genomic hypermethylation and reserve genomic methylation in the majority of ICRs.

### Serum Treatment Increases the Efficiency of LIF-Dependent ESC Adaptation

Because S/L-ESCs possess high levels of DNA methylation (Habibi et al., 2013), we next asked if serum treatment (prior to adaptation of L-ESCs) may enhance the DNA methylation and then increase the efficiency of LIF-dependent ESC adaptation. We switched 2i/L-ESCs to S/L medium for 5 days and then cultured induced S/L-ESCs in L medium to assess the LIF-dependent ESC adaptation efficiency. Our result indicates that S/L induction for 5 days significantly increased the number of AP<sup>+</sup> colonies compared with 2i/L-ESCs (Figures 4A and S4A). Consistent with this, 5-day S/L-induced 2i/L-ESCs were seeded into 24 wells in L medium, and the number of GOF/GFP<sup>+</sup> colonies obtained from the S/L induction group was drastically increased compared with 2i/L-ESCs (Figure 4B). To confirm this, flow cytometry analysis showed that the percentage of GOF/GFP<sup>+</sup> cells in the S/L induction group was also increased compared with 2i/L-ESCs (Figure 4C).

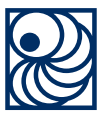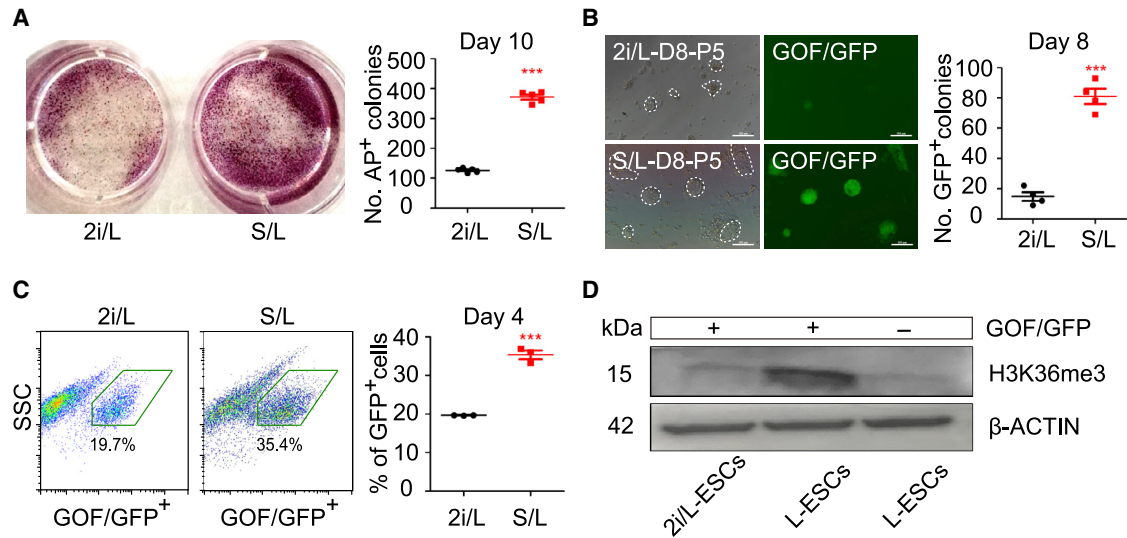

#### Figure 4. Serum Improves the Efficiency of L-ESC Adaptation

(A) Left: alkaline phosphatase (AP) staining on 2i/L-ESCs and S/L-ESCs (2i/L-ESCs cultured in S/L medium for 5 days) that were switched to L medium for 10 days of culture. Right: quantification of AP-positive colonies after 10 days of culture. Error bars are mean  $\pm$  SD ( $n = 5$ ). The  $p$  values were calculated by two-tailed Student's  $t$  test, \*\*\* $p < 0.05$ .

(B) Left: GOF/GFP<sup>+</sup> colonies on 2i/L-ESCs and S/L-ESCs (2i/L-ESCs cultured in S/L medium for 5 days) that were switched to L medium for 8 days of culture. Scale bars, 100  $\mu$ m. Right: quantification of GOF/GFP<sup>+</sup> colonies after 8 days of culture. Error bars are mean  $\pm$  SD ( $n = 4$ ). The  $p$  values were calculated by two-tailed Student's  $t$  test, \*\*\* $p < 0.05$ .

(C) Left: FACS based on GOF/GFP<sup>+</sup> cells, after 2i/L-ESCs and S/L-ESCs (2i/L-ESCs cultured in S/L medium for 5 days) were switched to L medium for 4 days of culture. Right: percentage of GOF/GFP<sup>+</sup> cells after 4 days of culture. Error bars are mean  $\pm$  SD ( $n = 3$ ). The  $p$  values were calculated by two-tailed Student's  $t$  test, \*\*\* $p < 0.05$ .

(D) Western blotting analysis for H3K36me3 in early adaptation stage (day 5) GOF/GFP<sup>+</sup> and GOF/GFP<sup>-</sup> L-ESCs (results of three independent experiments).

Furthermore, we tested this adaptation process of advanced stem cells (ASCs) (Bao et al., 2018; Wu et al., 2020) in LIF-alone medium and showed that ASCs can also be efficiently adapted into LIF-dependent ESCs using L medium (Figures S4B and S4C).

#### DNMTs Play an Important Role in L-ESC Self-Renewal

Next, we asked whether DNMTs are critical for this adaptation, and investigated the role of DNMTs in this early adaptation process. We separated GOF/GFP<sup>+</sup> and GOF/GFP<sup>-</sup> L-ESCs from early adaptation processes (day 5) by FACS. As expected, *Dnmt3a* and *Dnmt3l* expression levels in GOF/GFP<sup>+</sup> L-ESCs were significantly higher than in GOF/GFP<sup>-</sup> L-ESCs (Figure S3B), as well as DNMT3A protein level (Figure 3C). Interestingly, we also found a higher expression level of H3K36me3 in GOF/GFP<sup>+</sup> early adaptation stage (day 5) L-ESCs (Figure 4D). This result is consistent with recent reports of H3K36me3 as a guard for the DNA methylation process (Xu et al., 2019).

We next examined the role of DNMTs in regulating L-ESC self-renewal processes using the DNMT inhibitor 5-aza-2'-deoxycytidine (5-Aza). 5-Aza has been widely used as a

DNMT inhibitor to experimentally induce gene expression and cellular differentiation (Beyrouthy et al., 2009; Juttermann et al., 1994). We cultured 2i/L-ESCs and L-ESCs in their respective media with 5-Aza and observed morphological changes in both 2i/L-ESCs and L-ESCs. 5-Aza-treated 2i/L-ESCs retained their typical dome-shaped clonal morphology and were able to stably propagate for at least 10 passages (Figures 5A and S5A). In addition, there were slight changes in the expression levels of pluripotent genes (including *Nanog*, *Sox2*, and *Prdm14*) between 5-Aza-treated 2i/L-ESCs and untreated 2i/L-ESCs (Figure S5B). However, L-ESCs treated with 5-Aza failed to maintain self-renewal. There were few GOF/GFP<sup>+</sup> L-ESCs that survived after 7 days of 5-Aza treatment and the cells underwent apoptosis eventually (Figure 5B). In addition, we performed western blotting analysis on 48-h 5-Aza-treated L-ESCs and 2i/L-ESCs compared with control L-ESCs and 2i/L-ESCs. The results show that 5-Aza treatment significantly reduces DNMT3A, DNMT3B, DNMT3L, and DNMT1 protein levels in L-ESCs and 2i/L-ESCs (Figure S5C). The above results show that 5-Aza treatment affects self-renewal of L-ESCs mainly through DNMTs.

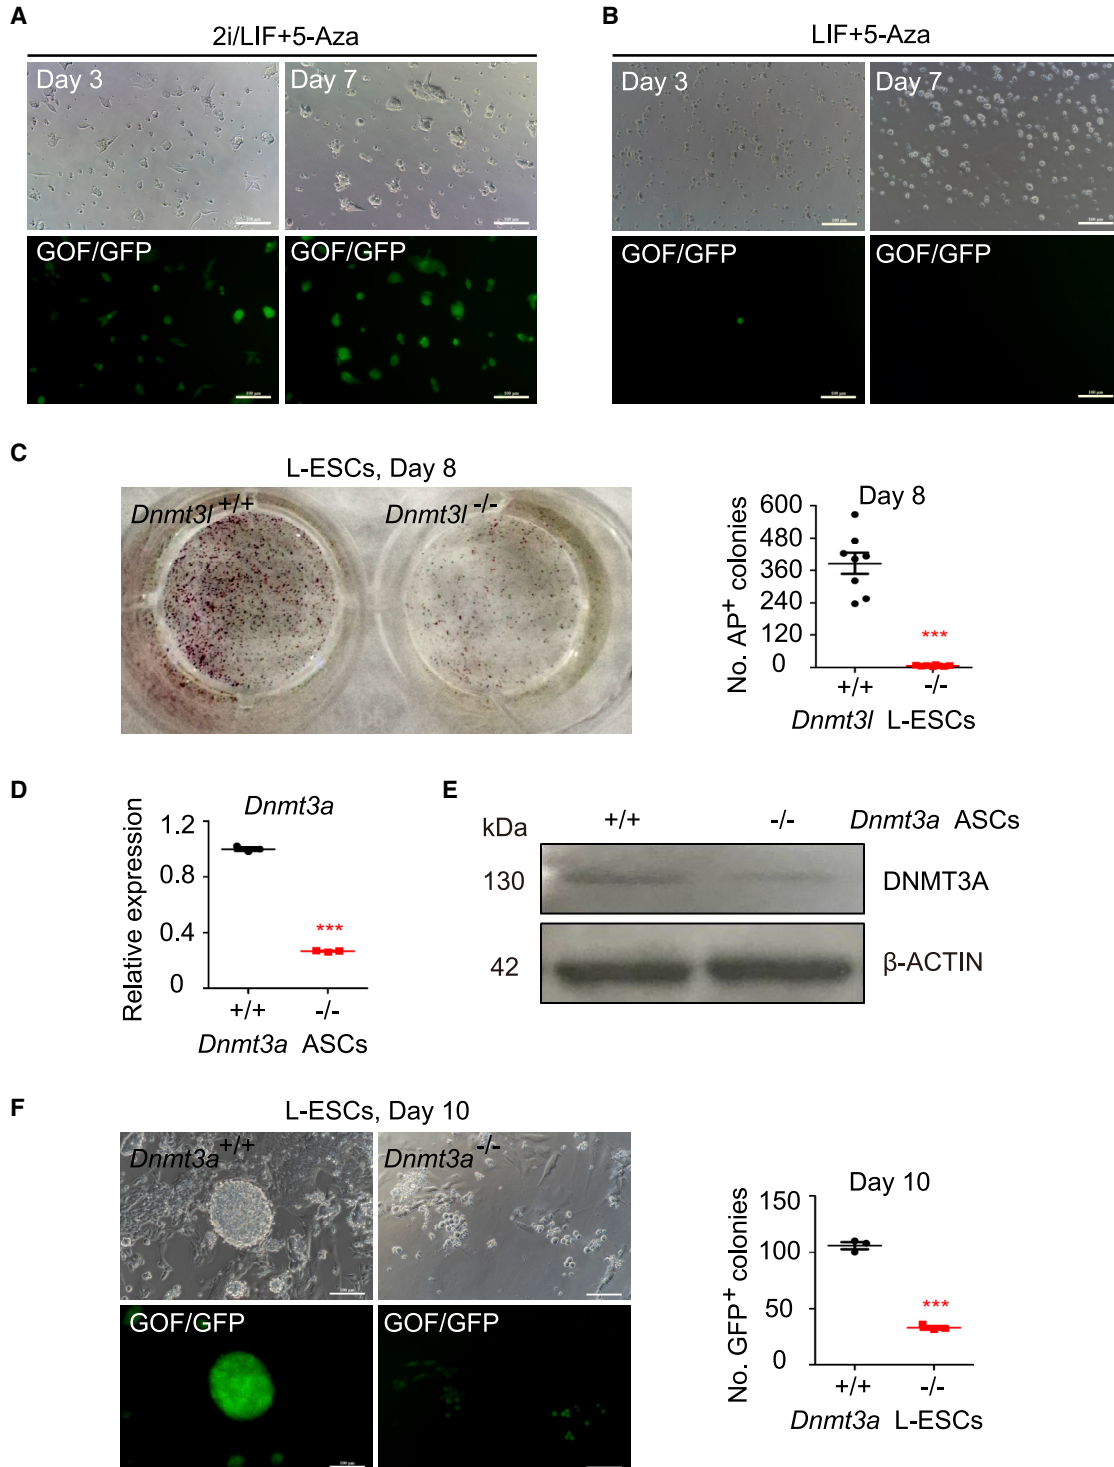

### Figure 5. DNMTs Play an Important Role in L-ESC Self-Renewal

(A) 2i/L-ESCs were treated with 5-Aza for 3 and 7 days; 2i/L-ESCs retained their typical dome-shaped clonal morphology (results of three independent experiments). Scale bars, 100  $\mu$ m.

(B) L-ESCs were treated with 5-Aza for 3 and 7 days; a few GOF/GFP<sup>+</sup> L-ESCs survived after 7 days of 5-Aza treatment and finally underwent apoptosis (results of three independent experiments). Scale bars, 100  $\mu$ m.

(legend continued on next page)





To further investigate the important role of DNMTs in LIF-dependent ESC adaptation processes, we used *Dnmt3l* knockout ESCs (*Dnmt3l*<sup>-/-</sup> ESCs), which were cultured in S/L medium (Figure 5C), and a *Dnmt3a* knockout ASC line (*Dnmt3a*<sup>-/-</sup> ASCs), which was generated in ABC/L medium (N2B27 basic medium supplemented with activin A, BMP4, CHIR99021, and LIF) (Figures 5D and 5E) (Bao et al., 2018; Wu et al., 2020) and switched to chemically defined L medium. As expected, both *Dnmt3l* and *Dnmt3a* knockout ESCs showed significantly reduced efficiency of LIF-dependent ESC adaptation (Figures 5C and 5F). Whereas wild-type ESCs and ASC-derived L-ESCs displayed normal self-renewal and proliferation, the proliferation of *Dnmt3l*<sup>-/-</sup> and *Dnmt3a*<sup>-/-</sup> L-ESCs decreased dramatically (Figures 5C and 5F). In addition, to avoid influence from the original culture system, we used the same approach and adapted *Dnmt3l*<sup>-/-</sup> ESCs (S/L medium) and *Dnmt3a*<sup>-/-</sup> ASCs (ABC/L medium) to 2i/LIF medium for 20 days, and followed by switching to L medium to measure the derivation efficiency of *Dnmt3l*<sup>-/-</sup> and *Dnmt3a*<sup>-/-</sup> ESCs. Compared with S/L-cultured *Dnmt3l*<sup>-/-</sup> ESCs and ABC/L-cultured *Dnmt3a*<sup>-/-</sup> ASCs, both groups showed significantly reduced L-ESC derivation efficiency (Figure S5D). This result showed that the initial DNA methylation level affects the efficiency of L-ESC derivation. In addition, we found that *Dnmt3a*<sup>-/-</sup> and *Dnmt3l*<sup>-/-</sup> cells in L medium could be passaged more than 10 times and remained in the self-renewal and heterogenetic state as assayed three times by FACS (Figure S5E), failing to convert to the homogenetic state like the above L-ESCs. In addition, recent studies have focused on the H3K27me3 state in 2i/L-ESCs and S/L-ESCs (Kumar and Elsasser, 2019; McLaughlin et al., 2019; Shukla et al., 2020; van Mierlo et al., 2019). Notably, we found that the level of H3K27me3 in L-ESCs is higher than in 2i/L-ESCs and S/L-ESCs, which may show that L-ESCs are in a special new state, different from 2i/L-ESCs and S/L-ESCs (Figure S5F). Taken together, our data demonstrate that DNMTs promote the induction of LIF-dependent ESC adaptation.

#### **In Vitro and In Vivo Differentiation Ability of L-ESCs**

An important criterion for pluripotent ESCs is the ability to differentiate *in vitro* and *in vivo* (De Los Angeles et al., 2015). Upon 2i and LIF withdrawal, pluripotent ESCs differentiate

into three germ layers, mesoderm, endoderm, and ectoderm (Shen et al., 2008). We tested the basal expression levels of lineage markers in 2i/L-ESCs and L-ESCs. Our results indicated that several lineage markers were altered, with reduced expression of *Hand1*, *Gata6*, and *Sox17*, and increased expression of *T*, *Sox1*, and *Nestin*, while some were unaltered, such as *Evx1*, *Gata4*, and *Pax6* in 0-day L-ESCs compared with 2i/L-ESCs (Figures S6A). Further to ESC differentiation, we cultured 2i/L-ESCs and L-ESCs in N2B27 basic medium, without 2i/L and LIF. After 3- and 6-day differentiation, we performed qPCR analysis and immunostaining. Interestingly, after 3-day differentiation, the expression levels of all mesoderm, endoderm, and ectoderm genes were significantly increased in L-ESCs compared with 2i/L-ESCs (Figure 6A). Compared with 3-day differentiation, 6-day culturing significantly increased mesoderm, endoderm, and ectoderm gene expression level in 2i/L-ESCs, but found only *T* and *Sox17* increased in L-ESCs after 6-day culture (Figures S6B and S6C). This indicates that L-ESCs have strong flexibility and differentiation ability that depends on environment changes. Nevertheless, 6-day differentiation ability between 2i/L-ESCs and L-ESCs was not significantly different for mesoderm, endoderm, and ectoderm marker gene expression and protein levels (Figures 6B and S6D). In addition, similar to 2i/L-ESCs, L-ESCs also generated teratomas that contained derivatives of the three germ layers (Figure 6C). The results showed that L-ESCs have differentiation ability both *in vitro* and *in vivo* and are able to express important differentiation genes in a shorter space of time compared with 2i/L-ESCs.

#### **Contribution of L-ESCs to Full-Term Embryonic Development**

Finally, we tested the *in vivo* developmental potential of L-ESCs in chimeric embryos. Using L-ESCs derived from 2i/L-ESCs, we injected L-ESCs into eight-cell-stage embryos (Figure 7A). We noticed that L-ESCs successfully integrated into E13.5 germlines of chimeras. Notably, 36.8% (7/19) of recovered embryos showed chimeric contribution and 57.1% (4/7) of chimeric embryos displayed germline contribution (Figures 7B and 7C). We further tested whether it is possible to obtain L-ESC-derived postnatal chimeric mice. Of 20 pups born, 5 L-ESC-derived chimeras (25%) were

(C) Left: AP staining on wild-type ESCs and *Dnmt3l*<sup>-/-</sup> ESCs switched to L medium for 8 days of culture. Right: quantification of AP<sup>+</sup> colonies after 8 days of culture. Error bars are mean ± SD (n = 8). The p values were calculated by two-tailed Student's *t* test, \*\*\*p < 0.05. (D) Relative expression of *Dnmt3a* by qPCR in *Dnmt3a*<sup>-/-</sup> ASCs and *Dnmt3a*<sup>+/+</sup> ASCs. Error bars are mean ± SD (n = 3). The p values were calculated by two-tailed Student's *t* test, \*\*\*p < 0.05. (E) Western blotting analysis for DNMT3A in *Dnmt3a*<sup>-/-</sup> ASCs and *Dnmt3a*<sup>+/+</sup> ASCs (results of three independent experiments). (F) Left: GOF/GFP<sup>+</sup> colonies on wild-type ASCs and *Dnmt3a*<sup>-/-</sup> ASCs switched to L medium for 10 days of culture. Right: quantification of GOF/GFP<sup>+</sup> colonies after 10 days of culture. Error bars are mean ± SD (n = 8). The p values were calculated by two-tailed Student's *t* test, \*\*\*p < 0.05.

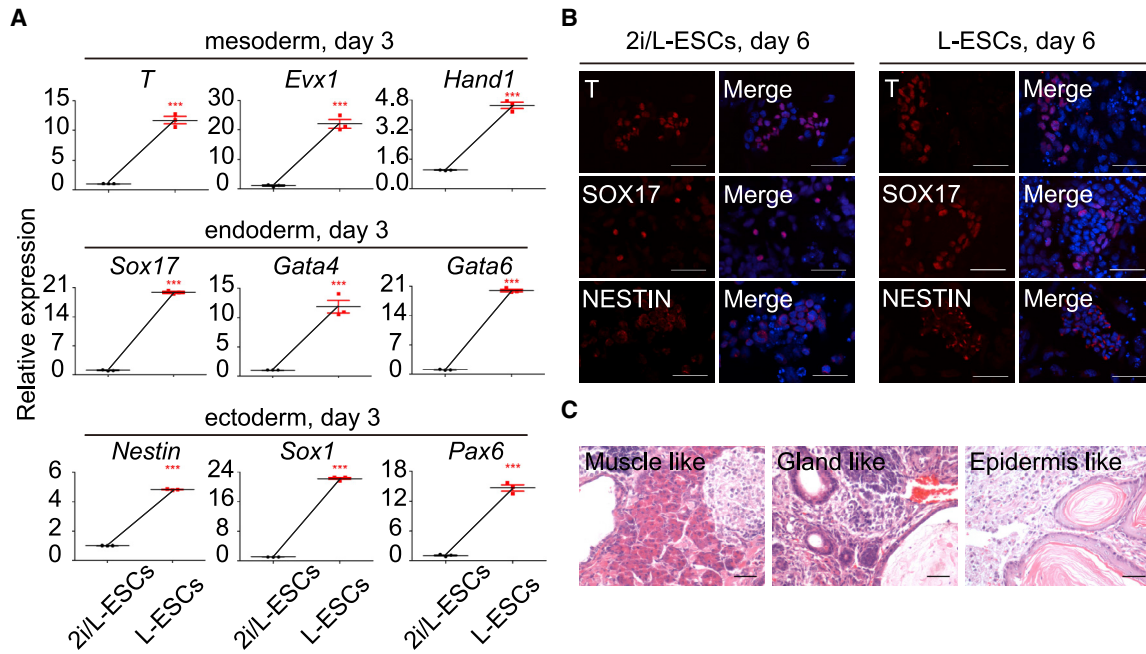

**Figure 6. *In Vitro* and *In Vivo* Differentiation Ability of L-ESCs**

(A) Relative expression of mesoderm, endoderm, and ectoderm genes measured by qPCR, after L-ESCs underwent 3 days of *in vitro* differentiation. Error bars are mean  $\pm$  SD ( $n = 3$ ). The  $p$  values were calculated by two-tailed Student's  $t$  test, \*\*\* $p < 0.05$ .

(B) Immunostaining of T, SOX17, and NESTIN, after 2i/L-ESCs and L-ESCs underwent 6 days of *in vitro* differentiation (results of three independent experiments). Scale bars, 50  $\mu$ m.

(C) Mature teratomas from L-ESCs. Left: mesoderm, muscle-like cells. Middle: endoderm, gland-like cells. Right: ectoderm, epidermis-like cells. The sections were stained with H&E (results of three independent experiments). Scale bars, 50  $\mu$ m.

obtained (Figures 7D and 7E). Hence, these data demonstrate the L-ESCs have ESC pluripotency and chimeric competency for both germlines and full-term development.

## DISCUSSION

ESCs are derived from the ICM of the blastocyst and can self-renew indefinitely *in vitro* (Ying et al., 2003, 2008). The signals of WNT, ERK, and JAK/STAT3 are main regulators that combine to control pluripotency; however, the precise functions of the individual signaling pathways are unclear (Ohtsuka et al., 2015). In this study, we present the induction of one new cell type, L-ESCs from 2i/L-ESCs, which depend on JAK/STAT3 signaling alone, and provide new insights into the naive pluripotent stem cells. In particular, L-ESCs show higher DNA methylation levels than 2i/L-ESCs (Figure 3A), and based on transcriptional level, L-ESCs appear to be at an intermediate state between naive ESCs and primed EpiSCs (Figure 2A). We also find that genomic imprints are more stable in L-ESCs relative to 2i/L-ESCs (Figure 3D). Based on the gene expression and DNA methylome analysis, L-ESCs appear to be at an intermediate state between naive ESCs and primed EpiSCs,

and may represent stable cells with the characteristics of the early postimplantation epiblast.

LIF signaling includes JAK/STAT, MARK, and PI(3)K pathways, and stimulates a state of self-renewal, as well as determining the fate of cells (Ohtsuka et al., 2015). In mouse ESCs, it is generally believed that LIF signaling is skewed toward survival and self-renewal, whereas activation of canonical WNT signaling and blockade of FGF/ERK inhibits cell differentiation (Ohtsuka et al., 2015). These L-ESCs maintained self-renewal and pluripotency over passage 40. We show that L-ESCs died in 10 days in medium with JAK inhibitor (Figures 1F and 1G). It is clear that LIF is critical to L-ESCs' self-renewal and to maintain an undifferentiated state. The majority of 2i/L-ESCs undergo differentiation in this regime, and only a small proportion of cells that highly express DNMT3A indicates the presence of naive ESCs, which JAK/STAT3 may favor to bind to cofactors or an intrinsic factor that promotes self-renewal. Recently Tai et al. reported that STAT3 signaling functions in a binary "on/off" manner; however, they used S/L medium, and the defined mechanism needs to be further explored (Tai et al., 2014).

DNA methylation is important for mammalian embryonic development, and DNA-methylation-deficient

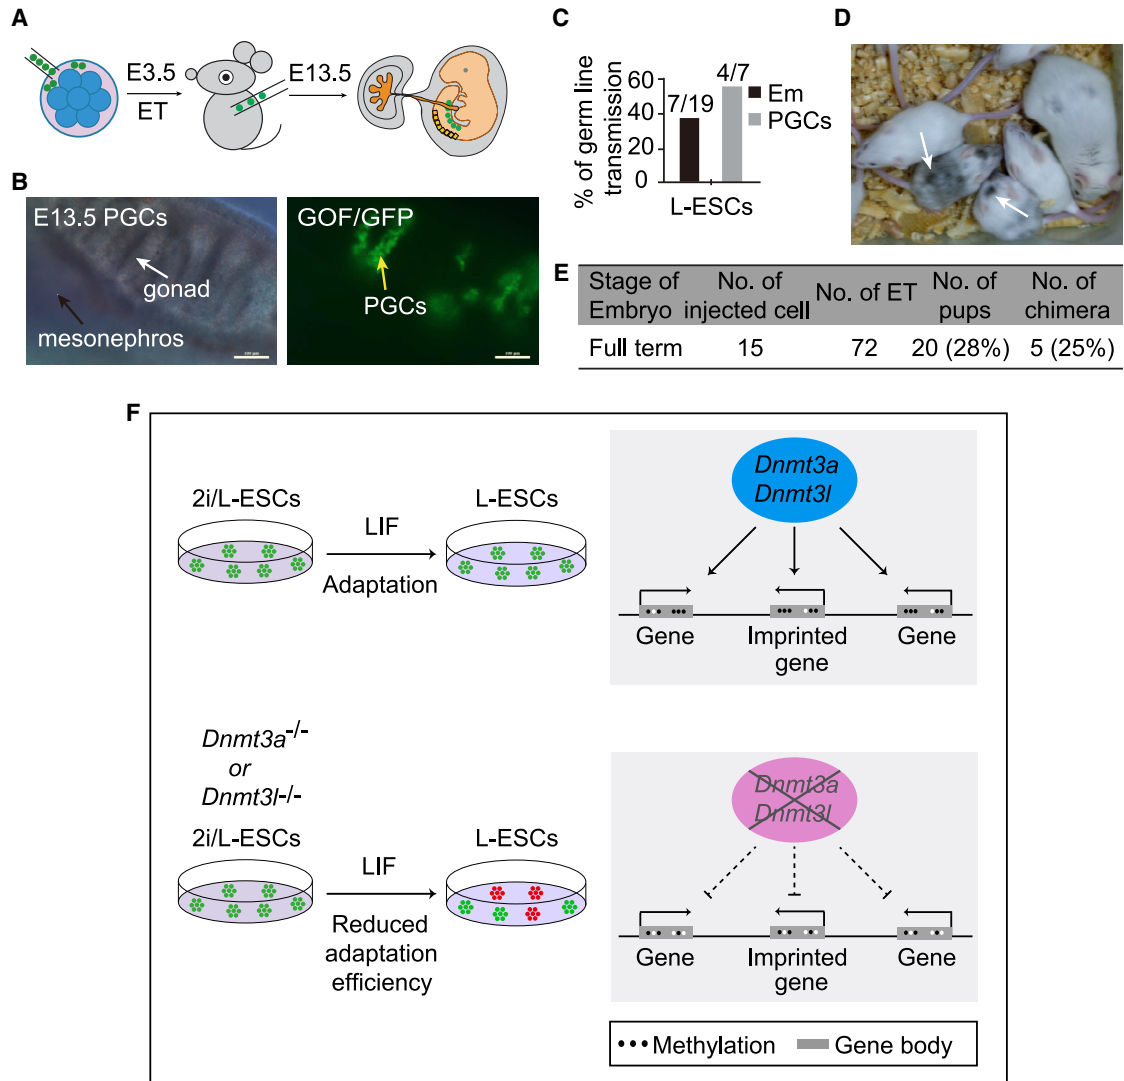

### Figure 7. Capability of L-ESCs for Full-Term Embryonic Development

- (A) Schematic of eight-cell embryo injection protocol.
- (B) Germline transmission of L-ESCs in E13.5 chimeras. Primordial germ cells (PGCs) are shown by GOF/GFP<sup>+</sup> cells (arrow). Black arrow, mesonephros; white arrow, gonad; yellow arrow, gonadal PGCs (n = 2 independent experiments). Scale bars, 100  $\mu$ m.
- (C) Summary of E13.5 chimera assays by L-ESC injection. The black bar shows the percentage of chimeras among the collected E13.5 conceptuses (Em, embryonic tissues); gray bar shows integration into PGCs among the recovered E13.5 chimeras (n = 2 independent experiments).
- (D) Chimeric pups generated by injecting L-ESCs into ICR host blastocysts (n = 3 independent experiments).
- (E) The summary of full-term chimeric pups derived from L-ESCs (n = 3 independent experiments).
- (F) Schematic of how DNA methylation affects the LIF-dependent ESC adaptation process.

embryos die at an early stage of development (Greenberg and Bourc'his, 2019). Here, we show that *Dnmt3a* and *Dnmt3l* knockout and 5-Aza treatment affect the efficiency of L-ESC adaptation and L-ESC self-renewal. Interestingly, mouse S/L-ESCs knocked out for *Dnmt1*, *Dnmt3a*, and *Dnmt3b* exhibit DNA hypomethylation, grow stably, and maintain their undifferentiated characteristics (Tsumura

et al., 2006). Unlike mouse ESCs, conventional "primed" human ESCs cannot tolerate *Dnmt1* deletion, emphasizing the functional differences between mouse and human ESCs (Liao et al., 2015). Here, we suggest that ESCs cultured in LIF alone exhibit medium-dependent DNA hypermethylation, and *Dnmt3a* or *Dnmt3l* knockout L-ESCs fail to maintain the homogenetic state. Notably, LIF-dependent



ESC adaptation efficiency is significantly reduced in *Dnmt3a* or *Dnmt3l* knockout ESCs (Figure 7F). Recently, multiple studies suggested that H3K36me3 participates in cross talk with other chromatin marks and promotes *de novo* DNA methylation by interacting with DNMTs and SETD2 (Xu et al., 2019). H3K36me3 is responsible for establishing and safeguarding the maternal epigenome (Xu et al., 2019). Our results showed that H3K36me3 and DNMT3A were highly expressed in L-ESCs. Epigenetics, including genomic imprinting, has widespread roles in mammals, affecting embryonic and placental development and transmission of nutrients to the fetus, and regulating critical aspects of mammalian physiology, such as metabolism, neuronal development, and adult behavior (Plasschaert and Bartolomei, 2014). We show that L-ESCs reserve hypermethylated imprinting genes, which poses the unique feature of L-ESCs. In conclusion, this study demonstrates that LIF alone is capable of supporting mouse ESC pluripotency, and DNMTs play an important role in L-ESC derivation and self-renewal.

## EXPERIMENTAL PROCEDURES

### Derivation of L-ESCs

2i/L-ESCs ( $1 \times 10^5$ ) were switched to fibronectin-coated (16.7  $\mu\text{g}/\text{mL}$ , Millipore) 24-well cell culture plates containing L medium, which is N2B27 medium supplemented with LIF (1,000 IU/mL, Millipore), and we call these cells L-ESCs. Further information is provided in [Supplemental experimental procedures](#).

### Immunostaining

Cultured ESCs were briefly washed with PBS and fixed in 4% paraformaldehyde in PBS for 15 min at room temperature. Antibody staining was carried out in the same buffer at 4°C overnight and secondary antibody was added for 1 h at room temperature in the dark. Further information is provided in [Supplemental experimental procedures](#).

### Production of Chimeras

Eight to ten ESCs were injected gently into ICR mouse eight-cell-stage embryos using a piezo-assisted micromanipulator attached to an inverted microscope. The injected embryos were cultured in KSOM medium (Millipore) at 37°C in a 5% CO<sub>2</sub> atmosphere overnight and then transferred to the uteri of pseudopregnant ICR mice at 2.5 days post coitus. The embryos were isolated at embryonic stage E13.5 and checked for germline transmission. Full-term chimeras were confirmed by the coat color pattern of the pups at birth.

### Karyotyping

ESCs were prepared for cytogenetic analysis by treatment with colcemid (Sigma) at a final concentration of 0.1  $\mu\text{g}/\text{mL}$  for 3 h to accumulate cells in metaphase. Cells were then exposed to 0.075 M KCl for 25 min at 37°C and fixed with 3:1 methanol:acetic acid. Air-

dried slides were generated and G-banded following standard GTG banding protocols.

### Generation of *Dnmt3a* knockout ASC Lines

Guide RNA sequences were cloned into the plasmid px459 (Addgene, 62988). px459 plasmids containing *Dnmt3a* guide RNAs were co-transfected into digested ASCs using Lipofectamine 2000 (Thermo Fisher). Further information is provided in [Supplemental experimental procedures](#).

### RNA Extraction and Sequencing

Total RNA was extracted from approximately  $1-2 \times 10^6$  cells using an RNeasy Mini Kit (QIAGEN) according to the recommendations of the manufacturer. Further information is provided in [Supplemental experimental procedures](#).

### RNA-seq Data Analysis

Before alignment, raw data were first trimmed to remove reads with more than 10% low-quality bases and to trim adaptors. Then the clean reads were mapped to the mouse reference genome (mm10) with Tophat (2.0.12) with default settings (Trapnell et al., 2009). Further information is provided in [Supplemental experimental procedures](#).

### Genomic DNA Isolation and WGBS Library Preparation

Following the manufacturer's instructions, genomic DNA was extracted from stem cells using the DNeasy Blood & Tissue Kit (QIAGEN). Remaining RNA was removed by treating with RNase A. Further information is provided in [Supplemental experimental procedures](#).

### DNA Methylation Analysis

WGBS reads were trimmed with Trim Galore (v.0.3.3) to remove adaptors and low-quality bases. Then we used Bismark (v.0.7.6) (Krueger and Andrews, 2011) to map the clean reads to the mouse reference genome (mm10) with a paired-end and non-directional model; then the unmapped reads were realigned to the same genome with a single-end and non-directional model. Further information is provided in [Supplemental experimental procedures](#).

### Statistical Analysis

All values are depicted as the mean  $\pm$  SD. Statistical parameters, including statistical analysis, statistical significance, and n value, are reported in the figure legends and supplemental figure legends. Statistical analyses were performed using Prism software (GraphPad Prism v.6). The significance of differences was measured using an unpaired two-tailed Student's *t* test. A value of  $p < 0.05$  was considered significant.

## ACCESSION NUMBERS

The RNA-seq data are available through the NCBI Sequence Read Archive under the ID PRJNA601004. WGBS data have been deposited in the NCBI Gene Expression Omnibus

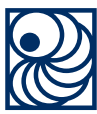

under accession no. GSE142799. All data that support the conclusions in the study are available from the authors on reasonable request.

## SUPPLEMENTAL INFORMATION

Supplemental Information can be found online at <https://doi.org/10.1016/j.stemcr.2021.01.017>.

## AUTHOR CONTRIBUTIONS

B.W., F.T., M.A.S., X.L., and S.B. designed the experiments, prepared and approved the manuscript. B.W., Y.L., B.Z., Y.W., and Y.F. conducted the experiments. B.L. analyzed the RNA-seq data. L.L. and J.G. prepared whole-genome bisulfite-sequencing experiments and analyses of bisulfite-sequencing data. C.C. and S.L. helped proof the manuscript.

## DECLARATION OF INTEREST

The authors declare that they have no competing interests.

## ACKNOWLEDGMENTS

We are grateful to Dr. Guoliang Xu for the gift of the *Dnmt3l* knockout ESCs. We thank Dr. Shuguang Duo for technical assistance on *Dnmt3a* knockout ESC generation. We thank Dr. Juan Li for critical reading of the manuscript. We also thank Xinxin Li for technical support on cell sorting. Part of the bioinformatics analysis was performed on the Computing Platform of the Peking-Tsinghua Center for Life Science at Peking University. This work was supported by the Program of Higher-Level Talents of Inner Mongolia University, the Inner Mongolia Autonomous Region Science and Technology Plan of China (2020ZD0007), the National Natural Science Foundation of China (31560335), and the Ministry of Science and Technology of China (2017YFA0102702).

Received: July 9, 2020

Revised: January 25, 2021

Accepted: January 26, 2021

Published: February 25, 2021

## REFERENCES

Atlasi, Y., Megchelenbrink, W., Peng, T., Habibi, E., Joshi, O., Wang, S.Y., Wang, C., Logie, C., Poser, I., Marks, H., et al. (2019). Epigenetic modulation of a hardwired 3D chromatin landscape in two naive states of pluripotency. *Nat. Cell Biol.* *21*, 568–578.

Aulicino, E., Pedone, E., Sottile, F., Lluís, F., Marucci, L., and Cosma, M.P. (2020). Canonical Wnt pathway controls mESC self-renewal through inhibition of spontaneous differentiation via beta-catenin/TCF/LEF functions. *Stem Cell Rep.* *15*, 646–661.

Bao, S., Tang, F., Li, X., Hayashi, K., Gillich, A., Lao, K., and Surani, M.A. (2009). Epigenetic reversion of post-implantation epiblast to pluripotent embryonic stem cells. *Nature* *461*, 1292–1295.

Bao, S., Tang, W.W., Wu, B., Kim, S., Li, J., Li, L., Kobayashi, T., Lee, C., Chen, Y., Wei, M., et al. (2018). Derivation of hypermethylated pluripotent embryonic stem cells with high potency. *Cell Res.* *28*, 22–34.

Beyrouthy, M.J., Garner, K.M., Hever, M.P., Freemantle, S.J., Eastman, A., Dmitrovsky, E., and Spinella, M.J. (2009). High DNA methyltransferase 3B expression mediates 5-aza-deoxycytidine hypersensitivity in testicular germ cell tumors. *Cancer Res.* *69*, 9360–9366.

Boroviak, T., Loos, R., Bertone, P., Smith, A., and Nichols, J. (2014). The ability of inner-cell-mass cells to self-renew as embryonic stem cells is acquired following epiblast specification. *Nat. Cell Biol.* *16*, 516–528.

Bour'his, D., Xu, G.L., Lin, C.S., Bollman, B., and Bestor, T.H. (2001). Dnmt3L and the establishment of maternal genomic imprints. *Science* *294*, 2536–2539.

Choi, J., Huebner, A.J., Clement, K., Walsh, R.M., Savol, A., Lin, K., Gu, H., Di Stefano, B., Brumbaugh, J., Kim, S.Y., et al. (2017). Prolonged Mek1/2 suppression impairs the developmental potential of embryonic stem cells. *Nature* *548*, 219–223.

Cirio, M.C., Ratnam, S., Ding, F., Reinhart, B., Navara, C., and Chaillet, J.R. (2008). Preimplantation expression of the somatic form of Dnmt1 suggests a role in the inheritance of genomic imprints. *BMC Dev. Biol.* *8*, 9.

De Los Angeles, A., Ferrari, F., Xi, R., Fujiwara, Y., Benvenisty, N., Deng, H., Hochedlinger, K., Jaenisch, R., Lee, S., Leitch, H.G., et al. (2015). Hallmarks of pluripotency. *Nature* *525*, 469–478.

Ernst, J., and Bar-Joseph, Z. (2006). STEM: a tool for the analysis of short time series gene expression data. *BMC Bioinformatics* *7*, 191.

Gao, X., Nowak-Imialek, M., Chen, X., Chen, D., Herrmann, D., Ruan, D., Chen, A.C.H., Eckersley-Maslin, M.A., Ahmad, S., Lee, Y.L., et al. (2019). Establishment of porcine and human expanded potential stem cells. *Nat. Cell Biol.* *21*, 687–699.

Greenberg, M.V.C., and Bour'his, D. (2019). The diverse roles of DNA methylation in mammalian development and disease. *Nat. Rev. Mol. Cell Biol.* *20*, 590–607.

Habibi, E., Brinkman, A.B., Arand, J., Kroeze, L.I., Kerstens, H.H., Matarese, F., Lepikhov, K., Gut, M., Brun-Heath, I., Hubner, N.C., et al. (2013). Whole-genome bisulfite sequencing of two distinct interconvertible DNA methylomes of mouse embryonic stem cells. *Cell Stem Cell* *13*, 360–369.

Hackett, J.A., Kobayashi, T., Dietmann, S., and Surani, M.A. (2017). Activation of lineage regulators and transposable elements across a pluripotent spectrum. *Stem Cell Rep.* *8*, 1645–1658.

Huang, G., Ye, S., Zhou, X., Liu, D., and Ying, Q.L. (2015). Molecular basis of embryonic stem cell self-renewal: from signaling pathways to pluripotency network. *Cell Mol. Life Sci.* *72*, 1741–1757.

Joshi, O., Wang, S.Y., Kuznetsova, T., Atlasi, Y., Peng, T., Fabre, P.J., Habibi, E., Shaik, J., Saeed, S., Handoko, L., et al. (2015). Dynamic reorganization of extremely long-range promoter-promoter interactions between two states of pluripotency. *Cell Stem Cell* *17*, 748–757.

Juttermann, R., Li, E., and Jaenisch, R. (1994). Toxicity of 5-aza-2'-deoxycytidine to mammalian cells is mediated primarily by covalent trapping of DNA methyltransferase rather than DNA demethylation. *Proc. Natl. Acad. Sci. U S A* *91*, 11797–11801.

Kaneda, M., Okano, M., Hata, K., Sado, T., Tsujimoto, N., Li, E., and Sasaki, H. (2004). Essential role for de novo DNA methyltransferase

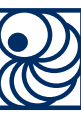

- Dnmt3a in paternal and maternal imprinting. *Nature* 429, 900–903.
- Kinoshita, M., Barber, M., Mansfield, W., Cui, Y., Spindlow, D., Stirparo, G.G., Dietmann, S., Nichols, J., and Smith, A. (2020). Capture of mouse and human stem cells with features of formative pluripotency. *Cell Stem Cell* 19, 30543–30549.
- Krueger, F., and Andrews, S.R. (2011). Bismark: a flexible aligner and methylation caller for Bisulfite-Seq applications. *Bioinformatics* 27, 1571–1572.
- Kumar, B., and Elsasser, S.J. (2019). Quantitative multiplexed ChIP reveals global alterations that shape promoter bivalency in ground state embryonic stem cells. *Cell Rep.* 28, 3274–3284 e3275.
- Leitch, H.G., McEwen, K.R., Turp, A., Encheva, V., Carroll, T., Grabole, N., Mansfield, W., Nashun, B., Knezovich, J.G., Smith, A., et al. (2013). Naive pluripotency is associated with global DNA hypomethylation. *Nat. Struct. Mol. Biol.* 20, 311–316.
- Li, E., Bestor, T.H., and Jaenisch, R. (1992). Targeted mutation of the DNA methyltransferase gene results in embryonic lethality. *Cell* 69, 915–926.
- Li, M., and Izpisua Belmonte, J.C. (2018). Deconstructing the pluripotency gene regulatory network. *Nat. Cell Biol.* 20, 382–392.
- Liao, J., Karnik, R., Gu, H., Ziller, M.J., Clement, K., Tsankov, A.M., Akopian, V., Gifford, C.A., Donaghey, J., Galonska, C., et al. (2015). Targeted disruption of DNMT1, DNMT3A and DNMT3B in human embryonic stem cells. *Nat. Genet.* 47, 469–478.
- Macfarlan, T.S., Gifford, W.D., Driscoll, S., Lettieri, K., Rowe, H.M., Bonanomi, D., Firth, A., Singer, O., Trono, D., and Pfaff, S.L. (2012). Embryonic stem cell potency fluctuates with endogenous retrovirus activity. *Nature* 487, 57–63.
- Marks, H., Kalkan, T., Menafrá, R., Denissov, S., Jones, K., Hofmeister, H., Nichols, J., Kranz, A., Stewart, A.F., Smith, A., et al. (2012). The transcriptional and epigenomic foundations of ground state pluripotency. *Cell* 149, 590–604.
- Martin, G.R. (1981). Isolation of a pluripotent cell line from early mouse embryos cultured in medium conditioned by teratocarcinoma stem cells. *Proc. Natl. Acad. Sci. U S A* 78, 7634–7638.
- McLaughlin, K., Flyamer, I.M., Thomson, J.P., Mjoseng, H.K., Shukla, R., Williamson, I., Grimes, G.R., Illingworth, R.S., Adams, I.R., Pennings, S., et al. (2019). DNA methylation directs polycomb-dependent 3D genome re-organization in naive pluripotency. *Cell Rep.* 29, 1974–1985 e1976.
- Messerschmidt, D.M., Knowles, B.B., and Solter, D. (2014). DNA methylation dynamics during epigenetic reprogramming in the germline and preimplantation embryos. *Genes Dev.* 28, 812–828.
- Ohtsuka, S., Nakai-Futatsugi, Y., and Niwa, H. (2015). LIF signal in mouse embryonic stem cells. *JAKSTAT* 4, e1086520.
- Pasque, V., Karnik, R., Chronis, C., Petrella, P., Langerman, J., Bonora, G., Song, J., Vanheer, L., Sadhu Dimashkie, A., Meissner, A., et al. (2018). X chromosome dosage influences DNA methylation dynamics during reprogramming to mouse iPSCs. *Stem Cell Rep.* 10, 1537–1550.
- Plasschaert, R.N., and Bartolomei, M.S. (2014). Genomic imprinting in development, growth, behavior and stem cells. *Development* 141, 1805–1813.
- Schulz, E.G., Meisig, J., Nakamura, T., Okamoto, I., Sieber, A., Picard, C., Borensztein, M., Saitou, M., Bluthgen, N., and Heard, E. (2014). The two active X chromosomes in female ESCs block exit from the pluripotent state by modulating the ESC signaling network. *Cell Stem Cell* 14, 203–216.
- Shen, X., Liu, Y., Hsu, Y.J., Fujiwara, Y., Kim, J., Mao, X., Yuan, G.C., and Orkin, S.H. (2008). EZH1 mediates methylation on histone H3 lysine 27 and complements EZH2 in maintaining stem cell identity and executing pluripotency. *Mol. Cell* 32, 491–502.
- Shukla, R., Mjoseng, H.K., Thomson, J.P., Kling, S., Sproul, D., Dunican, D.S., Ramsahoye, B., Wongtawan, T., Treindl, F., Templin, M.F., et al. (2020). Activation of transcription factor circuitry in 2i-induced ground state pluripotency is independent of repressive global epigenetic landscapes. *Nucleic Acids Res.* 48, 7748–7766.
- Smith, A.G., Heath, J.K., Donaldson, D.D., Wong, G.G., Moreau, J., Stahl, M., and Rogers, D. (1988). Inhibition of pluripotential embryonic stem cell differentiation by purified polypeptides. *Nature* 336, 688–690.
- Stadler, M.B., Murr, R., Burger, L., Ivanek, R., Lienert, F., Scholer, A., van Nimwegen, E., Wirbelauer, C., Oakeley, E.J., Gaidatzis, D., et al. (2011). DNA-binding factors shape the mouse methylome at distal regulatory regions. *Nature* 480, 490–495.
- Tai, C.I., Schulze, E.N., and Ying, Q.L. (2014). Stat3 signaling regulates embryonic stem cell fate in a dose-dependent manner. *Biol. Open* 3, 958–965.
- Ter Huurne, M., Chappell, J., Dalton, S., and Stunnenberg, H.G. (2017). Distinct cell-cycle control in two different states of mouse pluripotency. *Cell Stem Cell* 21, 449–455 e444.
- Trapnell, C., Pachter, L., and Salzberg, S.L. (2009). TopHat: discovering splice junctions with RNA-Seq. *Bioinformatics* 25, 1105–1111.
- Tsumura, A., Hayakawa, T., Kumaki, Y., Takebayashi, S., Sakaue, M., Matsuoka, C., Shimotohno, K., Ishikawa, F., Li, E., Ueda, H.R., et al. (2006). Maintenance of self-renewal ability of mouse embryonic stem cells in the absence of DNA methyltransferases Dnmt1, Dnmt3a and Dnmt3b. *Genes Cells* 11, 805–814.
- van Mierlo, G., Dirks, R.A.M., De Clerck, L., Brinkman, A.B., Huth, M., Kloet, S.L., Saksouk, N., Kroeze, L.I., Willems, S., Farlik, M., et al. (2019). Integrative proteomic profiling reveals PRC2-dependent epigenetic crosstalk maintains ground-state pluripotency. *Cell Stem Cell* 24, 123–137 e128.
- Webster, K.E., O'Bryan, M.K., Fletcher, S., Crewther, P.E., Aapola, U., Craig, J., Harrison, D.K., Aung, H., Phutikanit, N., Lyle, R., et al. (2005). Meiotic and epigenetic defects in Dnmt3L-knockout mouse spermatogenesis. *Proc. Natl. Acad. Sci. U S A* 102, 4068–4073.
- Williams, R.L., Hilton, D.J., Pease, S., Willson, T.A., Stewart, C.L., Gearing, D.P., Wagner, E.F., Metcalf, D., Nicola, N.A., and Gough, N.M. (1988). Myeloid leukaemia inhibitory factor maintains the developmental potential of embryonic stem cells. *Nature* 336, 684–687.
- Wu, B., Li, L., Li, B., Gao, J., Chen, Y., Wei, M., Yang, Z., Zhang, B., Li, S., Li, K., et al. (2020). Activin A and BMP4 signaling expands potency of mouse embryonic stem cells in serum-free media. *Stem Cell Rep.* 14, 241–255.



- Wu, T., Liu, Y., Wen, D., Tseng, Z., Tahmasian, M., Zhong, M., Rafii, S., Stadtfeld, M., Hochedlinger, K., and Xiao, A. (2014). Histone variant H2A.X deposition pattern serves as a functional epigenetic mark for distinguishing the developmental potentials of iPSCs. *Cell Stem Cell* *15*, 281–294.
- Xu, Q., Xiang, Y., Wang, Q., Wang, L., Brind'Amour, J., Bogutz, A.B., Zhang, Y., Zhang, B., Yu, G., Xia, W., et al. (2019). SETD2 regulates the maternal epigenome, genomic imprinting and embryonic development. *Nat. Genet.* *51*, 844–856.
- Yagi, M., Kishigami, S., Tanaka, A., Semi, K., Mizutani, E., Wakayama, S., Wakayama, T., Yamamoto, T., and Yamada, Y. (2017). Derivation of ground-state female ES cells maintaining gamete-derived DNA methylation. *Nature* *548*, 224–227.
- Yang, Y., Liu, B., Xu, J., Wang, J., Wu, J., Shi, C., Xu, Y., Dong, J., Wang, C., Lai, W., et al. (2017). Derivation of pluripotent stem cells with in vivo embryonic and extraembryonic potency. *Cell* *169*, 243–257 e225.
- Ying, Q.L., Nichols, J., Chambers, I., and Smith, A. (2003). BMP induction of Id proteins suppresses differentiation and sustains embryonic stem cell self-renewal in collaboration with STAT3. *Cell* *115*, 281–292.
- Ying, Q.L., Wray, J., Nichols, J., Batlle-Morera, L., Doble, B., Woodgett, J., Cohen, P., and Smith, A. (2008). The ground state of embryonic stem cell self-renewal. *Nature* *453*, 519–523.
- Yoshimizu, T., Sugiyama, N., De Felice, M., Yeom, Y.I., Ohbo, K., Masuko, K., Obinata, M., Abe, K., Scholer, H.R., and Matsui, Y. (1999). Germline-specific expression of the Oct-4/green fluorescent protein (GFP) transgene in mice. *Dev. Growth Differ.* *41*, 675–684.
- Yu, L., Wei, Y., Sun, H.X., Mahdi, A.K., Pinzon Arteaga, C.A., Sakurai, M., Schmitz, D.A., Zheng, C., Ballard, E.D., Li, J., et al. (2020). Derivation of intermediate pluripotent stem cells amenable to primordial germ cell specification. *Cell Stem Cell* *S1934-5909*, 30541–30545.

**Stem Cell Reports, Volume 16**

**Supplemental Information**

**DNMTs Play an Important Role in Maintaining  
the Pluripotency of Leukemia Inhibitory  
Factor-Dependent Embryonic Stem Cells**

**Baojiang Wu, Yunxia Li, Bojiang Li, Baojing Zhang, Yanqiu Wang, Lin Li, Junpeng Gao, Yuting Fu, Shudong Li, Chen Chen, M. Azim Surani, Fuchou Tang, Xihe Li, and Siqin Bao**



**Stem Cell Reports**

**Supplemental Information**

**DNMTs Play an Important Role in Maintaining the Pluripotency of Leukemia  
Inhibitory Factor Dependent Embryonic Stem Cells**

**Baojiang Wu, Yunxia Li, Bojiang Li, Baojing Zhang, Yanqiu Wang, Lin Li,  
Junpeng Gao, Yuting Fu, Shudong Li, Chen Chen, M. Azim Surani, Fuchou Tang,  
Xihe Li, and Siqin Bao**

## **Inventory of Supplemental Information**

### **Supplemental Figures and Legends**

**Figure S1. Characteristics of L-ESCs. Related to Figure 1**

**Figure S2. Analyses of Molecular Features of L-ESCs. Related to Figure 2**

**Figure S3. Upregulation of DNA Methylation Level in L-ESCs. Related to Figure 3**

**Figure S4. Serum Improves the Efficiency of L-ESCs Adaptation. Related to Figure 4**

**Figure S5. DNMTs Play an Important Role in L-ESCs Self-renew. Related to Figure 5**

**Figure S6. *In vitro* and *in vivo* Differentiation Ability of L-ESCs. Related to Figure 6**

### **Supplemental Spreadsheets Tables**

**Table S1. WGBS data coverage and conversion efficiency (Related to Figure 3A)**

**Table S2. RT-qPCR primers and guide RNA sequences**

### **Supplemental Experimental Procedures**

**Supplemental reference**

## SUPPLEMENTARY FIGURE LEGENDS AND TABLES

### Figure S1. Characteristics of L-ESCs

- (A) Summary of L-ESCs derivation from 2i/L-ESCs.
- (B) The summary of fluorescence-activated cell sorting (FACS) based on GOF/GFP positive cells in different passages L-ESCs.
- (C) Morphology of L-ESCs at p43.
- (D) Alkaline phosphatase (AP) staining on L-ESCs (p24) (results of three independent experiments). Scale bars, 100  $\mu\text{m}$ .
- (E) Karyotyping of 2i/L-ESCs (P30, n = 50, results of three independent experiments) and L-ESCs (P30, n = 50, results of three independent experiments).
- (F) Immunostaining of OCT4, SOX2 and NANOG in 2i/ L-ESCs (results of three independent experiments). Scale bars, 50  $\mu\text{m}$ .
- (G) Immunostaining of MERVL and ZSCAN4 in 2i/L-ESCs and L-ESCs (results of three independent experiments). Scale bars, 50  $\mu\text{m}$ .
- (H) Immunostaining of H3K27me3 in 2i/L-ESCs and L-ESCs (results of three independent experiments). Scale bars, 50  $\mu\text{m}$ .
- (I) Derivation of L-ESCs from X/GFP ESCs (results of two independent experiments). Scale bars, 100  $\mu\text{m}$ .

### Figure S2. Analyses of Molecular Features of L-ESCs

- (A) Heatmap showing general pluripotent markers in L-ESCs (n = 3), 2i/L-ESCs (n = 3), S/L-ESCs (n = 3) and EpiSCs (n = 3) based on RNA-seq data.
- (B) Heatmap showing naïve pluripotent markers in L-ESCs (n = 3), 2i/L-ESCs (n = 3), S/L-ESCs (n = 3) and EpiSCs (n = 3) based on RNA-seq data.
- (C) Heatmap showing primed pluripotent markers in L-ESCs (n = 3), 2i/L-ESCs (n = 3), S/L-ESCs (n = 3) and EpiSCs (n = 3) based on RNA-seq data.
- (D) Relative expression of WNT signaling related genes by RNA-seq data. Error bars are mean  $\pm$  SD (n = 3). *P* values were calculated by two tailed Student's *t*-test, *p* < 0.05.
- (E) Western blotting analysis for ERK, p-ERK and  $\beta$ -CATENIN in L-ESCs and

2i/L-ESCs (results of three independent experiments).

(F) Heatmap of formative stem cells related genes in L-ESCs (n = 3) and 2i/L-ESCs (n = 3).

### **Figure S3. Upregulation of DNA Methylation Level in L-ESCs**

(A) DNA methylation level at various genomic features in L-ESCs (n = 3), 2i/L-ESCs (n = 3) and S/L-ESCs (n = 2).

(B) Relative expression of *Dnmt3a* and *Dnmt3l* measured by qPCR in GOF/GFP positive and negative L-ESCs; Relative expression of *Prdm14* and *Nanog* measured by qPCR in 2i/L-ESCs, S/L-ESCs and L-ESCs. Error bars are mean  $\pm$  SD (n = 3). *P* values were calculated by two tailed Student's *t*-test,  $p < 0.05$ .

(C) Expression levels of all histone genes in L-ESCs (n = 3) and 2i/ L-ESCs (n = 3) based on RNA-seq data.

(D) Heatmap showing DNA maintenance methylation-related genes in 2i/L-ESCs (n = 3) and L-ESCs (n = 3) based on RNA-seq data.

(E) Heatmap showing *Tet1*, *Tet2* and *Tet3* in 2i/L-ESCs (n = 3) and L-ESCs (n = 3) based on RNA-seq data.

### **Figure S4. Serum Improves the Efficiency of L-ESCs Adaptation**

(A) Summary of L-ESCs derivation from 2i/L-ESCs after 5 days S/L medium culture.

(B) Summary of AP positive cloning numbers on 2i/L-ESCs, ASCs and L-ESCs, when 2,000 cells were seeded into 6-well cell culture plate and 6 days culture.

(C) Summary of L-ESCs derivation from ASCs.

### **Figure S5. DNMTs Play an Important Role in L-ESCs Self-renew**

(A) 2i/L-ESCs were treated with 5-Aza after p10, 2i/L-ESCs retained typical dome-shaped clonal morphology (results of three independent experiments). Scale bars, 100  $\mu$ m.

(B) Relative expression of *Nanog*, *Sox2* and *Prdm14* measured by qPCR in 2i/L-ESCs after 3 days 5-Aza treatment. Error bars are mean  $\pm$  SD (n = 3). *P* values were

calculated by two tailed Student's *t*-test,  $p < 0.05$ .

(C) Western blotting analysis for DNMT3A, DNMT3B, DNMT3L and DNMT1 in 2i/L-ESCs, L-ESCs, 5-aza treated 2i/L-ESCs and L-ESCs (results of three independent experiments).

(D) Quantification of colonies number of 2i/L culture different stem cells (*Dnmt3l*-KO ESCs and *Dnmt3a*-KO ASCs) derived L-ESCs. Error bars are mean  $\pm$  SD ( $n = 3$ ). *P* values were calculated by two tailed Student's *t*-test,  $p < 0.05$ .

(E) *Dnmt3a*-KO cells in LIF medium could passage over ten passages, and still kept in self-renewal and heterogenetic state by three times FACS (results of three independent experiments).

(F) Western blotting analysis for H3K27me3 and Histone 3 in 2i/L-ESCs, L-ESCs, 5-aza treated 2i/L-ESCs and L-ESCs and S/L-ESCs (results of three independent experiments).

### **Figure S6. The Pluripotency of L-ESCs *in vivo* and *in vitro***

(A) Relative expression levels of mesoderm, endoderm and ectoderm related genes in 2i/L-ESCs and L-ESCs before (0-day) *in vitro* differentiation based on RNA-seq data. Error bars are mean  $\pm$  SD ( $n = 3$ ). *P* values were calculated by two tailed Student's *t*-test,  $p < 0.05$ .

(B) Relative expression of mesoderm, endoderm and ectoderm genes measured by qPCR, after 2i/L-ESCs were 3 days and 6 days *in vitro* differentiation. Error bars are mean  $\pm$ SD ( $n = 3$ ). *P* values were calculated by two tailed Student's *t*-test,  $p < 0.05$ .

(C) Relative expression of mesoderm, endoderm and ectoderm genes measured by qPCR, after L-ESCs were 3 days and 6 days *in vitro* differentiation. Error bars are mean  $\pm$ SD ( $n = 3$ ). *P* values were calculated by two tailed Student's *t*-test,  $p < 0.05$ .

(D) Relative expression of mesoderm, endoderm and ectoderm genes measured by qPCR, after 2i/L-ESCs and L-ESCs were 6 days *in vitro* differentiation. Error bars are mean  $\pm$ SD ( $n = 3$ ). *P* values were calculated by two tailed Student's *t*-test,  $p < 0.05$ .

**Figure S1**

**A**

| Cell line    | Original medium | Derived L-ESCs | Repeated times | Sex    |
|--------------|-----------------|----------------|----------------|--------|
| W1           | 2i/LIF          | yes            | 1              | male   |
| W2           | 2i/LIF          | yes            | 3              | male   |
| W4           | 2i/LIF          | yes            | 2              | male   |
| W5           | 2i/LIF          | yes            | 2              | male   |
| W6           | 2i/LIF          | yes            | 3              | male   |
| SQ3.3        | 2i/LIF          | yes            | 3              | female |
| X/GFP        | 2i/LIF          | yes            | 2              | female |
| <b>Total</b> | <b>2i/LIF</b>   | <b>yes</b>     | <b>16</b>      |        |

**B**

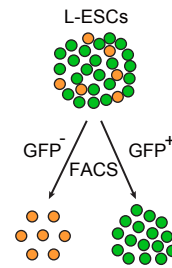

| Cell line | medium | No. Sorting | Passage | GFP <sup>+</sup> (%) |
|-----------|--------|-------------|---------|----------------------|
| W2        | LIF    | 1           | P23     | 66                   |
|           |        | 2           | P29     | 98                   |
|           |        | 3           | P31     | 99                   |
| W6        | LIF    | 1           | P14     | 56                   |
|           |        | 2           | P18     | 78                   |
|           |        | 3           | P21     | 91                   |
|           |        | 4           | P33     | 78                   |
|           |        | 5           | P42     | 98                   |
| W4        | LIF    | 1           | P34     | 97                   |
| W5        | LIF    | 1           | P34     | 98                   |
| W2        | 2i/LIF | 1           | P15     | 98                   |

**C**

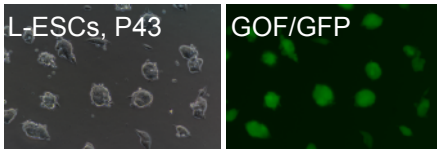

**D**

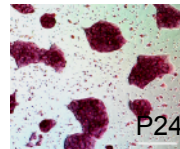

**E**

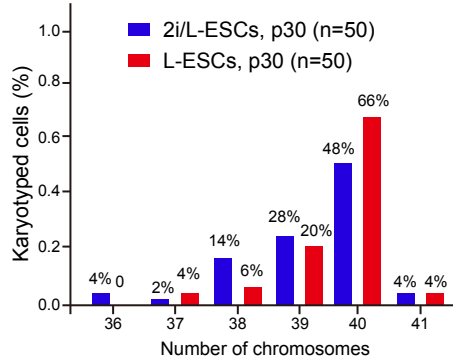

**F**

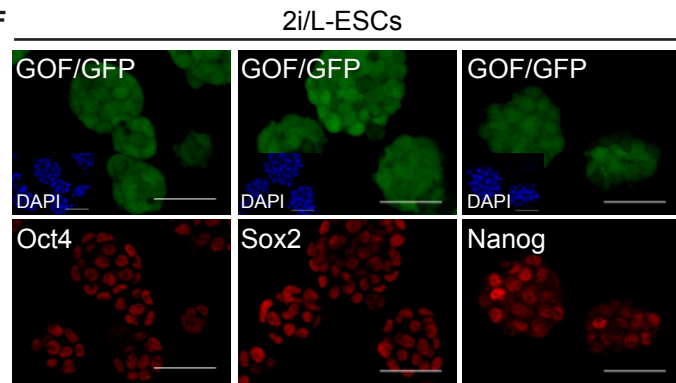

**G**

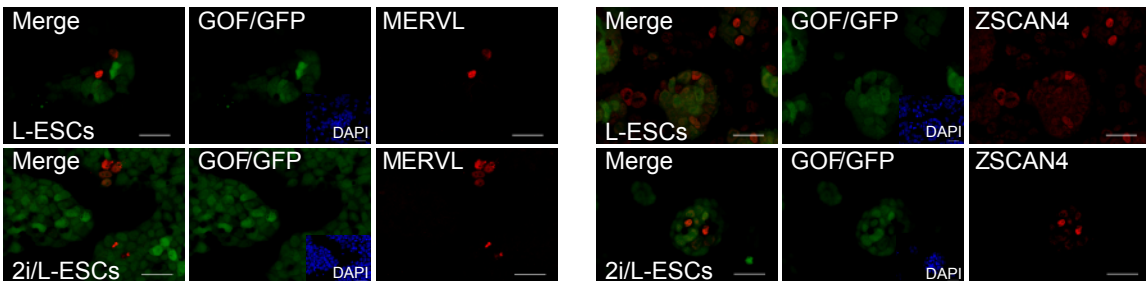

**H**

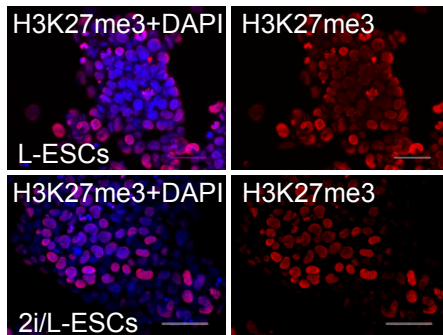

**I**

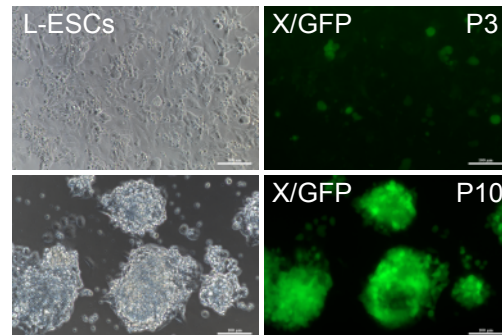

**Figure S2**

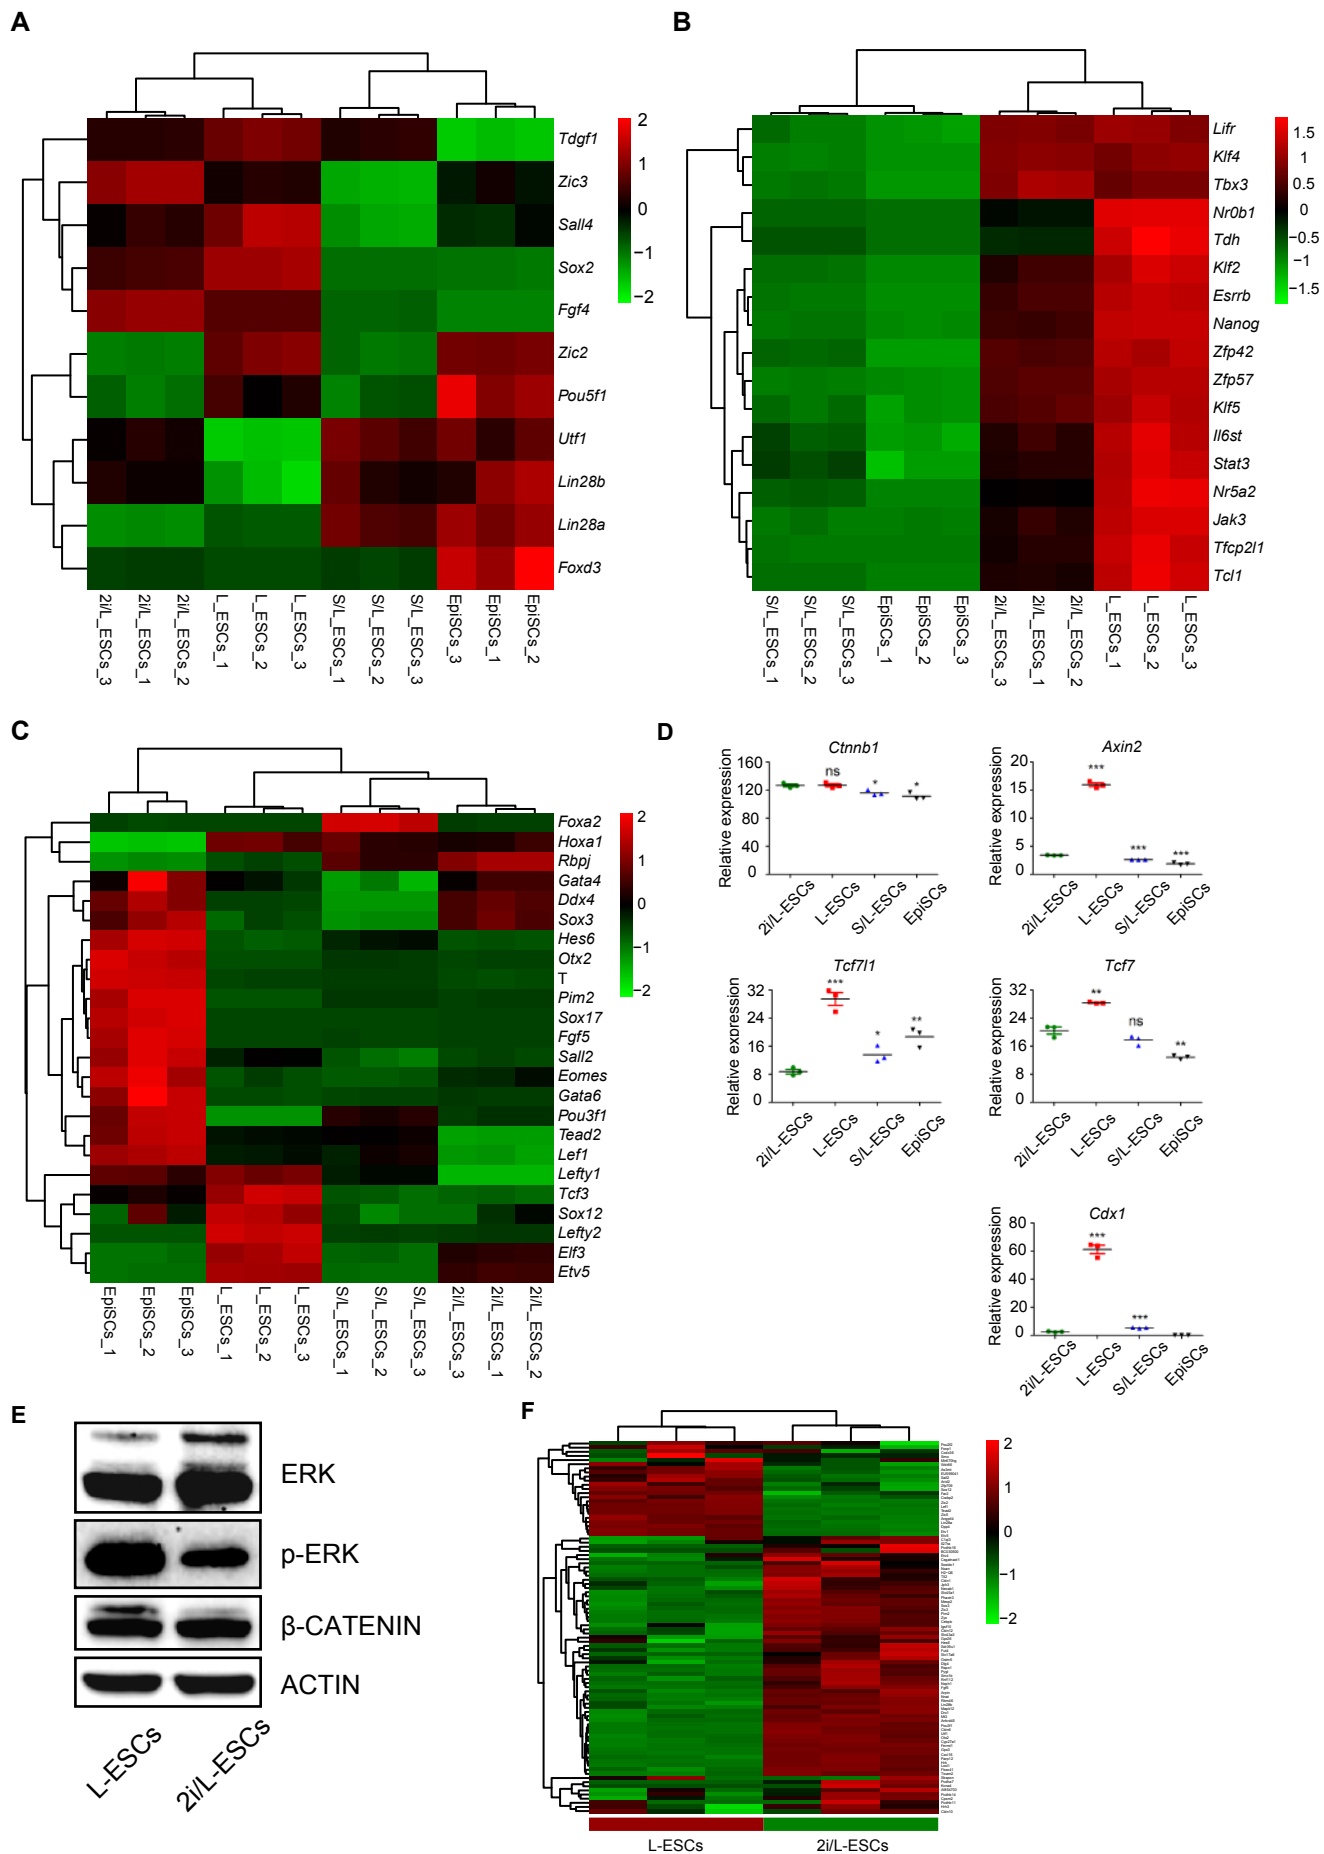

**Figure S3**

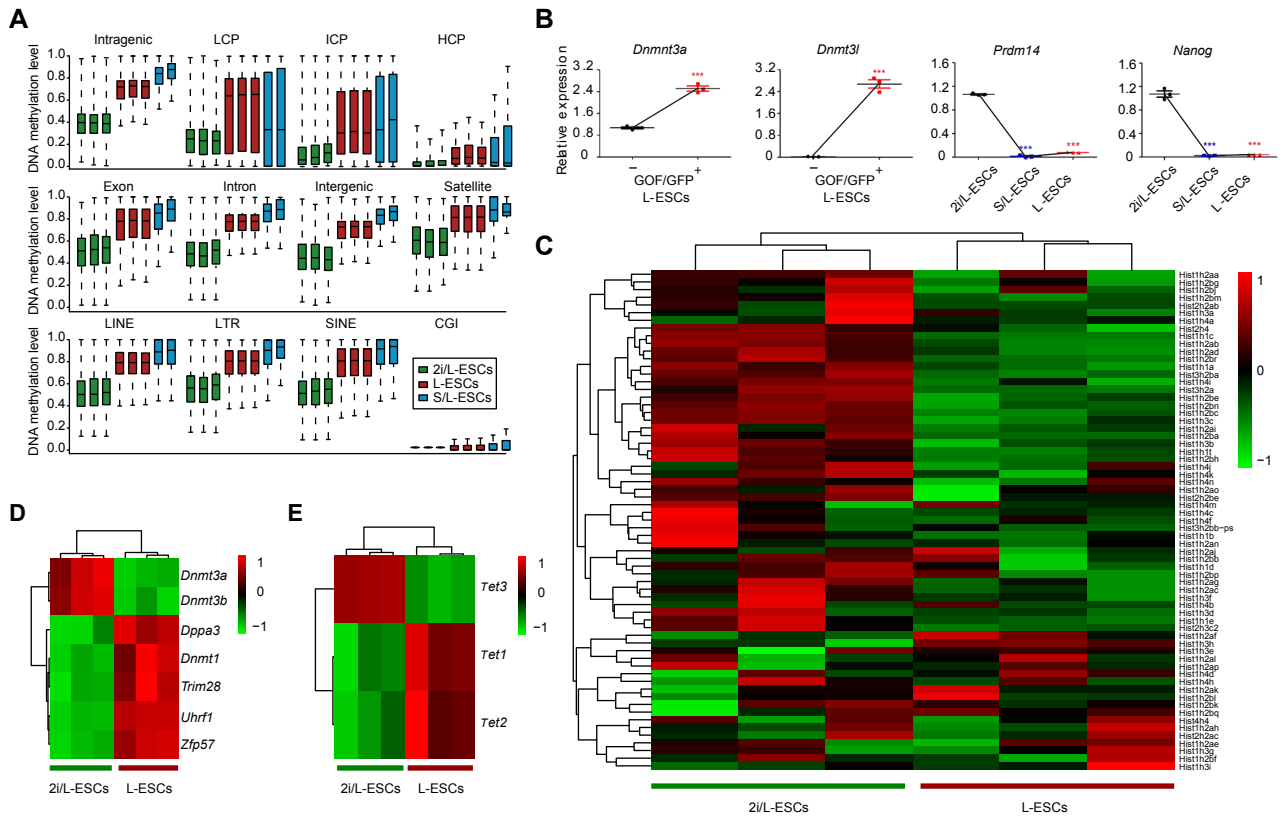



**Figure S4**

**A**

| Cell line                    | Original medium | S/L induction and L-ESCs reprogramming | Repeated times |
|------------------------------|-----------------|----------------------------------------|----------------|
| W2                           | 2i/L            | yes                                    | 3              |
| W6                           | 2i/L            | yes                                    | 4              |
| W4                           | 2i/L            | yes                                    | 4              |
| SQ3.3                        | 2i/L            | yes                                    | 2              |
| J1                           | S/L             | yes                                    | 3              |
| <i>Dnmt3l</i> <sup>-/-</sup> | S/L             | yes                                    | 3              |

**B**

| Cell line                          | W5     |        | 329  |      |      |      |
|------------------------------------|--------|--------|------|------|------|------|
| Culture medium                     | 2i+LIF | 2i+LIF | ABCL | ABCL | LIF  | LIF  |
| Number of AP <sup>+</sup> colonies | 1673   | 1862   | 3425 | 3672 | 1660 | 1548 |

**C**

| Cell line                    | Original medium | Reprogrammed L-ESCs | Repeated times |
|------------------------------|-----------------|---------------------|----------------|
| G3                           | ABCL            | yes                 | 3              |
| G3-AH                        | ABCL            | yes                 | 2              |
| G12                          | ABCL            | yes                 | 1              |
| 329                          | ABCL            | yes                 | 3              |
| <i>Dnmt3a</i> <sup>-/-</sup> | ABCL            | yes                 | 2              |

Figure S5

A

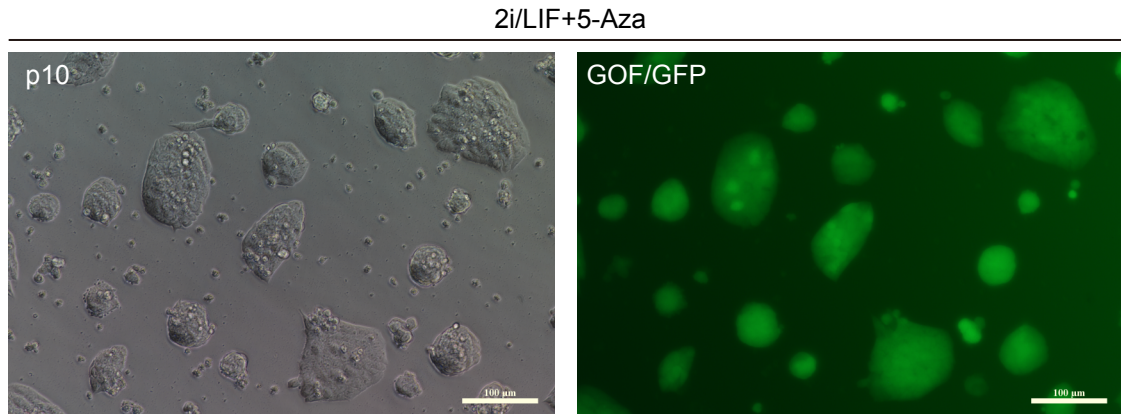

B

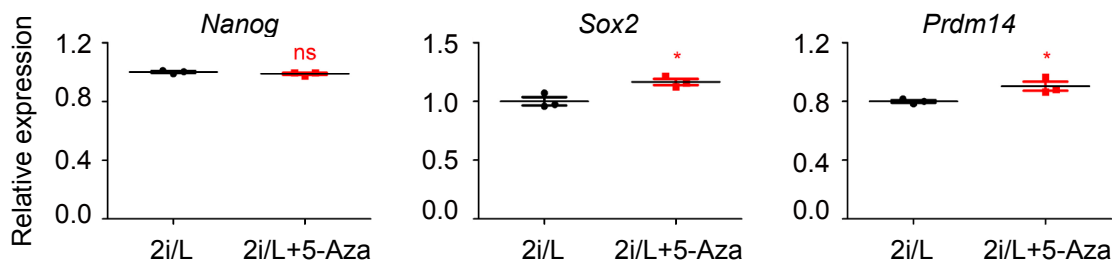

C

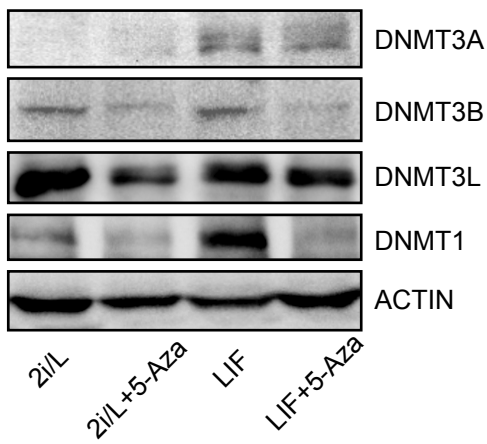

D

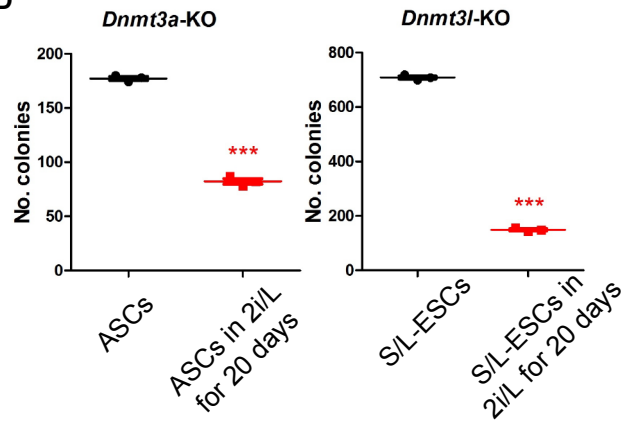

E

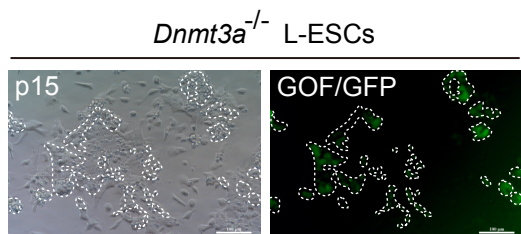

F

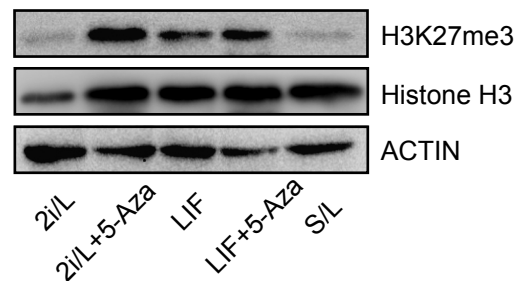

**Figure S6**

**A**

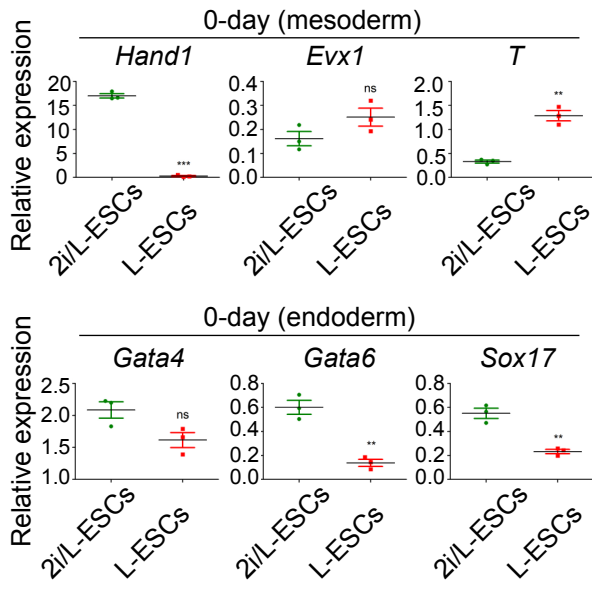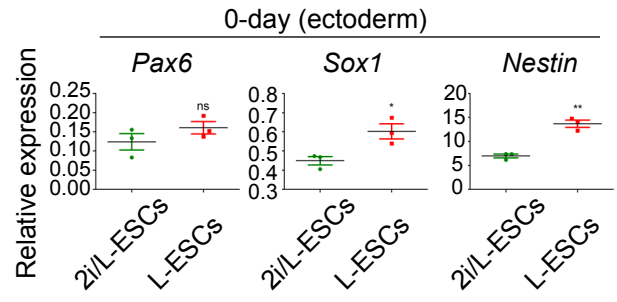

**B**

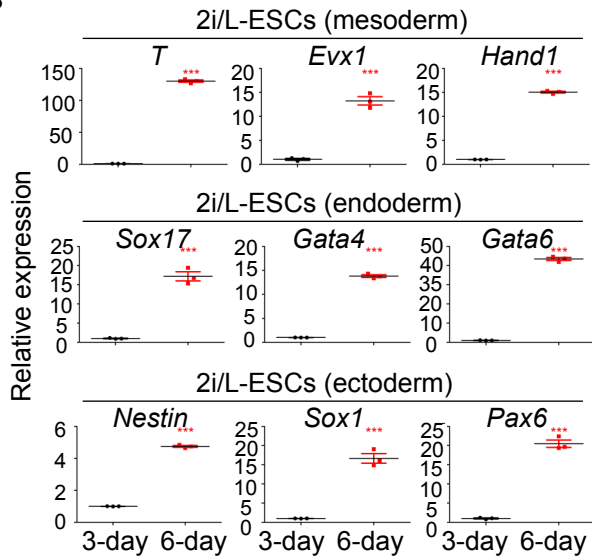

**C**

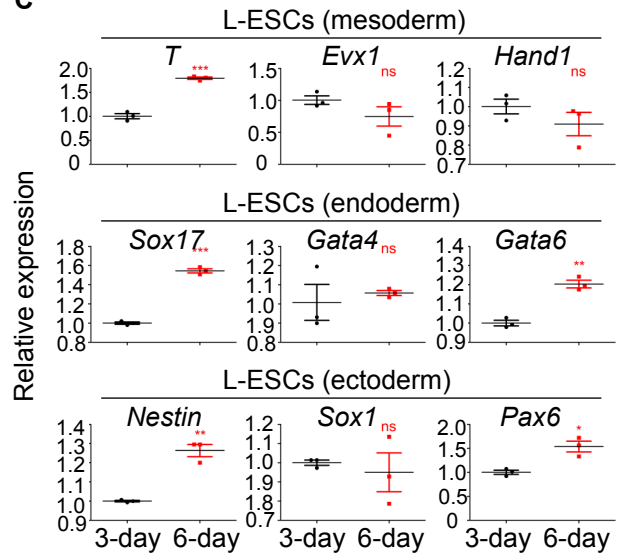

**D**

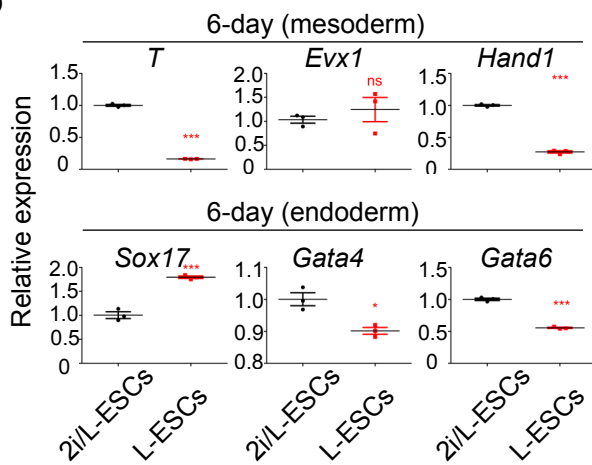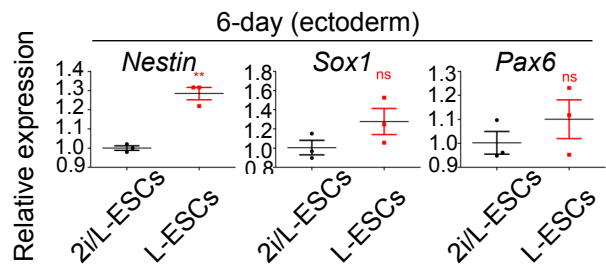

**Table S1. WGBS data coverage and conversion efficiency (Related to Fig 3A)**

| <b>Sample</b> | <b>Total sequenced bases(Gb)</b> | <b>Total sequenced reads</b> | <b>Reads after trimming</b> | <b>Unique mapped reads</b> | <b>Mapping efficiency</b> | <b>Coveraged bases (1x)</b> |
|---------------|----------------------------------|------------------------------|-----------------------------|----------------------------|---------------------------|-----------------------------|
| L-ESCs_rep1   | 23.36                            | 155,760,956                  | 151,382,966                 | 98,603,675                 | 65.14%                    | 2,317,989,827               |
| L-ESCs_rep2   | 26.20                            | 174,654,234                  | 168,555,054                 | 106,718,870                | 63.31%                    | 2,334,743,972               |
| L-ESCs_rep3   | 24.60                            | 163,969,284                  | 158,835,308                 | 103,120,363                | 64.92%                    | 2,346,240,160               |

| <b>Sample</b> | <b>Fraction of genome covered</b> | <b>Bisulfite Conversion Rate</b> | <b>No.of unique CpG covered (1x)</b> | <b>No.of unique CpG covered (3x)</b> | <b>No.of unique CpG covered (5x)</b> |
|---------------|-----------------------------------|----------------------------------|--------------------------------------|--------------------------------------|--------------------------------------|
| L-ESCs_rep1   | 85.05%                            | 99.96%                           | 30,757,370                           | 14,829,901                           | 5,277,450                            |
| L-ESCs_rep2   | 85.66%                            | 99.96%                           | 30,976,871                           | 15,454,751                           | 5,806,380                            |
| L-ESCs_rep3   | 86.08%                            | 99.96%                           | 31,620,932                           | 15,560,785                           | 5,654,681                            |

**Table S2. RT-qPCR Primers and Guide RNA sequences**

| <b>Gene name</b> | <b>Forward Primer</b>   | <b>Reverse Primer</b>   |
|------------------|-------------------------|-------------------------|
| <i>Nanog</i>     | CTTTCACCTATTAAGGTGCTTGC | TGGCATCGGTTTCATCATGGTAC |
| <i>Prdm14</i>    | CCTGAACAAGCACATGAGA     | TGCACTTGAAGGGCTTCTCT    |
| <i>Gata4</i>     | TTCCTCTCCCAGGAACATCAAA  | GCTGCACAACCTGGGCTCTACTT |
| <i>Gata6</i>     | TGCTGGAAATTGCAACAAACC   | GTCACGTGGTACAGGCGTCA    |
| <i>Sox17</i>     | GTCAACGCCTTCCAAGACTTG   | GTAAGGTGAAAGGCGAGGTG    |
| <i>Brachyury</i> | GAACCTCGGATTCACATCGT    | TTCTTTGGCATCAAGGAAGG    |
| <i>Evx1</i>      | CCAGTGACCAGATGCGCCGATAC | TCCTTCATGCGCCGGTTCT     |
| <i>Hand1</i>     | TCAAAAAGACGGATGGTGGT    | GCGCCCTTAAATCCTCTTCT    |
| <i>Dnmt3a</i>    | GACTCGCGTGCAATAACCTTAG  | GGTCACTTTCCTCACTCTGG    |
| <i>Dnmt31</i>    | CGGAGCATTGAAGACATC      | CATCATCATACAGGAAGAGG    |
| <i>Sox2</i>      | GCGGCGGAAAACCAAGA       | CCGGGAAGCGTGTACTTATCC   |
| <i>Nestin</i>    | CTCGAGCAGGAAGTGGTAGG    | TTGGGACCAGGGACTGTAG     |
| <i>Sox1</i>      | GGCCGAGTGAAGGTCATGT     | TCCGGGTGTTCTTCATGTG     |
| <i>Pax6</i>      | GCAGATGCAAAAGTCCAGGTG   | CAGGTTGCGAAGAACTCTGTTT  |
| <i>GAPDH</i>     | ATGGTGAAGGTGGTGTGAAC    | TCGCTCCTGGAAGATGGTGATG  |

**Guide RNA sequences**

|                            |                           |
|----------------------------|---------------------------|
| <i>Dnmt3a</i><br>sgRNA1    | CACCGCTCATACTCAGGCTCATCGT |
| <i>Dnmt3a</i><br>sgRNA1-CS | AAACACGATGAGCCTGAGTATGAGC |
| <i>Dnmt3a</i><br>sgRNA2    | CACCGGACCCTGCTTCTCCGACTG  |
| <i>Dnmt3a</i><br>sgRNA2-CS | AAACCAGTCGGAGAAGCAGGGTCC  |

**Genotyping primer**

|                                             |                      |
|---------------------------------------------|----------------------|
| <i>Dnmt3a</i><br>89925<br>Forward<br>Primer | GCCTTGCTGTGTGAGATTTG |
| <i>Dnmt3a</i><br>90586<br>Reverse<br>Primer | ATCCTGGAGCCCCAAAGAGC |

## **Supplemental Experimental Procedures**

### **Mice**

Animal care and use were conducted in accordance with the guidelines of Inner Mongolia University, China. Mice were housed in a temperature-controlled room with proper darkness-light cycles, fed with a regular diet, and maintained under the care of the Laboratory Animal Unit, Inner Mongolia University, China. The mice were sacrificed by cervical dislocation. This study was specifically approved by the Institutional Animal Care and Use Committee, Inner Mongolia University, China. Oct4- $\Delta$ PE-GFP (GOF/GFP) transgenic mice (Yoshimizu *et al*, 1999) were used here with a mixed background of MF1, 129/sv, and C57BL/6J strains.

### **Derivation of 2i/L-ESCs**

Mouse embryos blastocysts (E3.5) were isolated from 129/sv females mated with GOF/GFP transgenic males. Green fluorescence indicated that GFP expression of the reporter is under the control of *Oct4* promoter and distal enhancer. This GFP transgene shows expression in the ICM of blastocysts and PGC *in vivo*, and in ESCs (Yoshimizu *et al*, 1999). ESCs culture medium consists of N2B27 medium (Life technology) supplemented with PD0325901 (PD, 1  $\mu$ M, Miltenyi Biotec), CHIR99021 (CH, 3  $\mu$ M, Miltenyi Biotec) and leukemia inhibitory factor (LIF, 1000 IU/ml, Millipore), henceforth were called 2i/L medium. Zona pellucida of blastocysts were removed by Acidic Tyrode's Solution (Sigma-Aldrich), and then placed to 24-well fibronectin-coated (FN, 16.7  $\mu$ g/ml, Millipore) plate with 2i/L medium. ICM

of blastocysts cultures grew efficiently and formed outgrowing colonies in 5-7 days culture. The resulting colonies were further cutting into smaller pieces by glass needles after 5-7 days culture, and then the colonies passaged by Accutase (Life technology) regularly on at every 2 days interval.

### **Derivation of L-ESCs**

$1 \times 10^5$  2i/L-ESCs were switched on fibronectin-coated (16.7  $\mu\text{g/ml}$ , Millipore) 24-well cell culture plate containing L-medium which are N2B27 medium supplemented with leukemia inhibitory factor (1000 IU/ml, Millipore), and we call these cells as L-ESCs. Dependent on cell growth, L-ESCs were passage every other day in the early stage. After being cultured for different passages, GOF/GFP positive and negative L-ESCs were purified by flow-cytometry sorting by BD FACSAria (BD Biosciences) and further analysis. GOF/GFP positive purified L-ESCs were passage every other day treated with Accutase (Life technology). L-ESCs were capable of self-renewal for over 40 passages. For inhibitor treatment experiment, we added JAK inhibitor I (0.6  $\mu\text{M}$ , Calbiochem) or 5-Aza (6  $\mu\text{M}$ , Sigma) into L-ESCs culture medium.

### **Derivation of S/L-ESCs**

2i/L-ESCs were switch to fibronectin-coated plate with standard ES medium (Knockout DMEM; Knockout Dulbecco's modified Eagle's medium) supplemented with 20% fetal calf serum, 0.1 mM 2-mercaptoethanol, 2 mM L-glutamine, 0.1 mM

non-essential amino acid, 50 U/ml Penicillin/Streptomycin and 1000U/ml LIF without feeder cells, we named these cells as S/L-ESCs.

### **Flow Cytometry**

GOF/GFP ESCs were harvested by Accutaes and sorting by BD LSRFortessa. Green fluorescence indicated that GFP expression of the reporter is under the control of Oct4 promoter and distal enhancer. This GFP transgene shows expression in the ICM of blastocysts and PGCs *in vivo*, and in ESCs. No GOF/GFP ESCs were used for FACS gating negative control. Measure fluorescence (detector 488 nm channel for GFP) by flow cytometer. Gating out of residual cell debris and measure diploid and tetraploid DNA peaks. A region representing GFP-positive cells were used to identify living cells and collected.

### **Alkaline Phosphatase (AP) Staining**

AP staining was carried out using AP staining kit from Sigma (86R-1KT) according to manufacturer's instructions. Briefly, the cells were fixed by 4% paraformaldehyde for 10 min, and then were stained by AP staining solution for overnight at room temperature.

### **Cell Differentiation**

2i/L-ESCs and L-ESCs were cultured in N2B27 medium for 3 to 6 days withdrawal of PD0325901, CHIR99021 and LIF, and LIF respectively.



### **Colony Formation Assay**

Single 2i/L-ESCs and L-ESCs were seeded at a fibronectin-coated 96-well plates using mouth pipette, containing 2i/L and L-medium, respectively. The cells were cultured for 10 days and the number of colonies was assessed.

### **Generation of *Dnmt3a* Knockout ASCs Lines**

Guide RNA sequences were cloned into the plasmid px459 (Addgene, 62988). px459 containing *Dnmt3a* gRNAs were co-transfected into digested ASCs by Lipofectamine 2000 (Thermo Fisher). Single cell derived colonies were picked and expanded individually in ABC/L (N2B27 basic medium added with Activin A, BMP4, CHIR99021 and LIF) medium with puromycin. Genomic DNA of colonies was extracted using the DNeasy Blood & Tissue Kit, which was further analyzed by genomic PCR. Colonies with the deletion of *Dnmt3a* locus were identified. *Dnmt3a* knockout ASCs (*Dnmt3a*<sup>-/-</sup> ASCs) were cultured in ABC/L medium without puromycin. Guide RNA sequences and genotyping primer sequences used are given in Table S2.

### **Teratomas Formation**

The 2i/L-ESCs and L-ESCs were disaggregated using Accutase, and  $1 \times 10^6$  cells were injected into under epithelium of NOD-SCID mice. Three to five weeks after transplantation, tumor(s) were collected and fixed with 4% paraformaldehyde, and

processed for paraffin sectioning. Sections were observed following Hematoxylin and Eosin staining.

### **Immunostaining**

Cultured ESCs were briefly washed with PBS and fixed in 4% paraformaldehyde in PBS for 15 min at room temperature. Cells were permeabilized for 30 min with 1% BSA and 0.1% Triton X-100 in PBS. Antibody staining was carried out in the same buffer at 4 °C for overnight. The slides were subsequently washed three times in 1% BSA, 0.1% Triton X-100 in PBS (5 min each wash), were incubated with secondary antibody for 1h at room temperature in the dark, washed once for 5 min in 1% BSA, 0.1% Triton X-100 in PBS and twice for 5 min in PBS. The slides were then mounted in Vectashield with DAPI (Vector Laboratories) and imaged using a Olympus FV1000 confocal microscope. Primary antibodies used were: anti-OCT4 (BD Biosciences, Catalog Number: 611203, 1:200), anti-NANOG (eBioscience, Catalog Number: 14-5761, 1:500), anti-SOX2 (Santa cruz, Catalog Number: sc-17320, 1:200), anti-H3K27me3 (Upstate, Catalog Number: 07-449, 1:500), anti-ZSCAN4 (Abcam, Catalog Number: ab106646, 1:200), anti-MERVL (HuaAn Bio, Catalog Number: ER50102, 1:100), anti-DNMT3A (abcam, Catalog Number: ab79822, 1:500), anti-NESTIN (BOSTER Bio, Catalog Number: BM4494, 1:50), anti-BRACHYURY (R&D Systems, Catalog Number: AF2085, 1:100) and anti-SOX17 (R&D Systems, Catalog Number: AF1924, 1:100). All secondary antibodies used were Alexa Fluor highly cross adsorbed (Molecular Probes).

## Western Blot

Cells were collected with Accutase (Life technology), washed three times with DPBS, and lysed in buffer that contained 20 mM Tris (pH 8.0), 137 mM NaCl, 100 g/l glycerol, 50 g/l Triton X-100, and 4 g/l EDTA; 1  $\mu$ l PMSF (0.1 M) and 10  $\mu$ l phosphatase inhibitor (10 g/l) were added per 1 ml lysis buffer immediately before use. Proteins were denatured with 2  $\times$  SDS at 95  $^{\circ}$ C for 5 min. A total of 20  $\mu$ g denatured protein was run on 8% or 10% SDS-PAGE gel and transferred to polyvinylidene difluoride (PVDF) membrane. Membranes were blocked with 5% nonfat milk in 1  $\times$  TBS with 0.05% Tween-20 (TBST) for 1h. Samples were probed with primary antibodies overnight at 4  $^{\circ}$ C. The primary antibodies used were anti-DNMT3A (CST, 3598S; dilution 1:1,000), anti-DNMT3B (Abcam, ab78922; dilution 1:2,000), anti-DNMT3L (Abcam, ab3493; dilution 1:2,500), anti-DNMT1 (Abcam, ab19905; dilution 1:1,000), anti-H3K36me3 (Abcam, ab9050; working concentration, 1  $\mu$ g/ml), anti-phospho-p44/p42 MAPK (p-ERK1/2) (Cell Signaling Technology, 4370; dilution 1:2,000), anti-p44/p42 MAPK (ERK1/2) (Cell Signaling Technology, 4695; dilution 1:1,000), anti- $\beta$ -CATENIN (Cell Signaling Technology, 8480; dilution 1:1,000) and anti- $\beta$ -ACTIN (Abcam, ab8227; dilution 1:5,000). Blots were rinsed with TBST. Membranes were incubated with HRP-conjugated secondary antibodies for 60 min at room temperature, and proteins were detected by ECL plus reagent. After rinsing with TBST, Clarity<sup>TM</sup> Western ECL Substrate (BIO-RAD) was used for visualization, and ChemiDoc<sup>TM</sup> MP Imaging System (BIO-RAD) was used for band detection.

## **Real-Time PCR**

Total RNA was isolated with the RNeasy Plus Mini Kit (Qiagen) and reverse transcribed into cDNA using the Reverse Transcription System (Promega) according to the manufacturer's instructions. Quantitative real-time PCR (qRT-PCR) was conducted using a LightCycler® 96 Instrument (Roche Molecular Systems) and qRT-PCR reaction was performed with KAPA SYBR FAST qPCR kit (KAPA Biosystems). At least triplicate samples were assessed for each gene of interest, and GAPDH was used as a control gene. Relative expression levels were determined by the  $2^{-\Delta\Delta C_t}$  method. Primer sequences used are given in Table S2.

## **RNA Extraction and Sequencing**

Total RNA were extracted from approximately one million to two million cells using RNeasy Mini Kit (QIAGEN) according to the recommendation of manufacturer and then NEBNext® Poly (A) mRNA Magnetic Isolation Module was used to isolate mRNA from total RNA. Using mRNA as input, the first and second strand cDNAs were synthesized by NEBNext® RNA First Strand Synthesis Module and NEBNext® Ultra II Non-Directional RNA Second Strand Synthesis Module, respectively. Final libraries were prepared using KAPA Hyper Prep Kits (8 PCR cycles) and sequenced on HiSeq4000 platform.

## **RNA-seq Data Analysis**

Before alignment, raw data were first trimmed to remove reads with more than 10% low quality bases and to trim adaptors. Then the clean reads were mapped to mouse reference genome (mm10) with Tophat (2.0.12) with default settings (Trapnell *et al*, 2009). HTSeq (0.6.1) was used to do the reads counting, and then RefSeq gene expression level was estimated by RPKM method (Reads per kilobase transcriptome per million reads). Data of RNA-seq of S/L-ESCs and EpiSCs (GSE119985) were downloaded from previous study (Wu *et al*, 2020). *In vivo* data of mouse embryos E2.5-E5.5 were downloaded from ArrayExpress (E-MTAB-2958) (Boroviak *et al*, 2015). Differentially expressed genes (DEGs) in different samples were determined by edgeR package with fold-change  $\geq 2$  and p value  $\leq 0.5$  (Robinson *et al*, 2010). Unsupervised hierarchical clustering (UHC) analysis was performed by the R hclust function. Heatmaps of select genes were performed using R heatmap.2 function. Principal component analysis (PCA) analysis was performed with the R prcomp function. Gene ontology analysis was performed using Metascape (<http://metascape.org>). Trend analysis of DEGs was performed using Short Time-series Expression Miner (STEM) software (Ernst & Bar-Joseph, 2006).

## **Genomic DNA Isolation and WGBS Library Preparation**

Following the manufacturer's instructions, genomic DNA was extracted from stem cells using the DNeasy Blood & Tissue Kit (Qiagen). Remaining RNA was removed by treating with RNase A. Three replicated samples from each of these stem cells

were used for library preparation to ensure repeatability of experiment. In short, 2 µg of genomic DNA spiked with 10 ng of lambda DNA were fragmented to about 300 bp with Covaris S220. Next, end repair and A-ligation were performed to the DNA fragments. Methylated Adaptor (NEB) was then ligated to the DNA fragments. In order to reach >99% bisulfite conversion, the adaptor-ligated DNA was treated twice using EZ-96 DNA Methylation-Direct™ MagPrep (Zymo Research). The resulting single-strand DNA fragments were amplified by 4 PCR cycles using the KAPA HiFi HotStart Uracil+ ReadyMix (2×). At last, the libraries were sequenced on HiSeq4000 platform to generate 150-bp paired-end reads.

### **DNA Methylation Analysis**

Whole genome bisulfite sequencing reads were trimmed with Trim Galore (v0.3.3) to remove adaptors and low quality bases. Then we used Bismark (v0.7.6) (Krueger & Andrews, 2011) to map the clean reads to mouse reference genome (mm10) with a paired-end and non-directional model, then the unmapped reads were realigned to the same genome with a single-end and non-directional model. PCR duplications were removed with command ‘samtools rmdup’ (v0.1.18). WGBS data of 2i/L-ESCs (GSE119985) (Wu *et al*, 2020) and S/L-ESCs (GSE98517) (Hackett *et al*, 2017) were downloaded from previous study and identically processed. The global DNA methylation level, estimated using a 2 kb window across the genome, and DNA methylation level in each genomic regions was estimated based on 3x CpG sites (CpGs covered more than 3 times). Only regions with more than 3 CpGs covered

were retained. Genomic annotation, like exons, introns and repeat regions were downloaded from UCSC genome browser. Promoters were regions 1 kb upstream and 0.5 kb downstream of transcription start sites (TSS). Imprint control regions (ICR) were obtained from previous study (Xie *et al*, 2012), for the low coverage of published S/L-ESCs data, DNA methylation level on ICRs were estimated based on 1x CpG sites. Locations of ICRs were converted with UCSC LiftOver from mm9 to mm10.

### **Supplemental Reference**

Boroviak, T., Loos, R., Lombard, P., Okahara, J., Behr, R., Sasaki, E., Nichols, J., Smith, A., and Bertone, P. (2015). Lineage-Specific Profiling Delineates the Emergence and Progression of Naive Pluripotency in Mammalian Embryogenesis. *Dev Cell* 35: 366-382.

Ernst, J., and Bar-Joseph, Z. (2006). STEM: a tool for the analysis of short time series gene expression data. *BMC Bioinformatics* 7: 191.

Hackett, J.A., Kobayashi, T., Dietmann, S., and Surani, M.A. (2017). Activation of Lineage Regulators and Transposable Elements across a Pluripotent Spectrum. *Stem Cell Reports* 8: 1645-1658.

Krueger, F., and Andrews, S.R. (2011). Bismark: a flexible aligner and methylation caller for Bisulfite-Seq applications. *Bioinformatics* 27: 1571-1572.

Robinson, M.D., McCarthy, D.J., and Smyth, G.K. (2010). edgeR: a Bioconductor package for differential expression analysis of digital gene expression data.

Bioinformatics 26: 139-140.

Trapnell, C., Pachter, L., and Salzberg, S.L. (2009). TopHat: discovering splice junctions with RNA-Seq. *Bioinformatics* 25: 1105-1111.

Wu, B., Li, L., Li, B., Gao, J., Chen, Y., Wei, M., Yang, Z., Zhang, B., Li, S., Li, K. *et al* (2020). Activin A and BMP4 Signaling Expands Potency of Mouse Embryonic Stem Cells in Serum-Free Media. *Stem Cell Reports* 14: 241-255.

Xie, W., Barr, C.L., Kim, A., Yue, F., Lee, A.Y., Eubanks, J., Dempster, E.L., and Ren, B. (2012). Base-resolution analyses of sequence and parent-of-origin dependent DNA methylation in the mouse genome. *Cell* 148: 816-831.

Yoshimizu, T., Sugiyama, N., De Felice, M., Yeom, Y.I., Ohbo, K., Masuko, K., Obinata, M., Abe, K., Scholer, H.R., and Matsui, Y. (1999). Germline-specific expression of the Oct-4/green fluorescent protein (GFP) transgene in mice. *Dev Growth Differ* 41: 675-684.
